# Supplementary material
Source: PubMed Central journal article supplement (PMC2774939)
Supplement: NIHMS145773-supplement-01.pdf [file NIHMS145773-supplement-01.pdf]

## Supplemental Data

Global Analysis of Human Protein-DNA Interactions Reveals Preferred Binding Sites  
for Both Annotated and Unconventional DNA-Binding Proteins

Shaohui Hu\*, Zhi Xie\*, Akishi Onishi, Xueping Yu, Lizhi Jiang, Jimmy Lin,

Hee-sool Rho, Crystal Woodard, Hong Wang, Jun-Seop Jeong, Shunyou Long, Xiaofei He,

Herschel Wade, Seth Blackshaw<sup>#</sup>, Jiang Qian<sup>#</sup>, Heng Zhu<sup>#</sup>

This PDF file includes:

Supplemental Experimental Procedures

Figures S1 to S20

Tables S3 to S13

Supplemental References

The following tables are uploaded separately:

Table S1: DNA\_motifs.xls

Table S2: Protein\_annotation.xls

## Supplemental Experimental Procedures

### Identifying Tissue-specific Motifs

We developed a program to identify tissue-specific motifs. We first defined sets of tissue-specific or tissue-enriched genes by examining their gene expression profiles across multiple tissues (Yu et al., 2006). We then calculated the most over-represented single motifs (8-mers, including a wide character) in the promoters of each set of tissue-specific genes. The program then enumerated all possible combinations of the top  $n$  motifs (e.g.  $n = 100$ ). For each motif pair, the program recorded the occurrence of the motif pair in the promoter sequences. We then calculated the significance score for each motif pair, which was defined as the negative logarithm of the  $p$  value,  $-\log(p)$ . The motif pairs with scores above a specified threshold were considered putative TF binding motif pairs in the promoter sequences. With these predicted motif pairs, we could calculate a number of partners for each motif and select a certain number of top non-redundant motifs to be tested in the protein chip experiments.

Both the  $p$  values for a single motif and those for a motif pair were calculated using hypergeometric distribution. Here, we use a motif pair as an example to show the procedure. The  $p$  value of occurrence of the motif pair  $(i, j)$ ,  $P_{occ}^{i,j}$ , is calculated according to

$$P_{occ}^{i,j} = \sum_{k \geq g_{i,j}} \frac{C_n^k C_{N-n}^{G_{i,j}-k}}{C_N^{G_{i,j}}}, \quad (1)$$

where  $N$  is the number of all human promoters;  $n$  is the number of tissue-specific genes;  $G_{i,j}$  is the number of human promoters that contain the motif pair  $(i,j)$ , and  $g_{i,j}$  is the number of tissue-specific promoters that contains the motif pair.  $C_n^k$  is the number of possible combinations, using  $k$  members from a set of size  $n$ .

## Selection of DNA Motif Sequences

The total number of computationally predicted DNA motifs is 896, including 174 in (Xie et al., 2005), 233 in (Xie et al., 2007), 272 in (Elemento and Tavazoie, 2005), 73 in (Elemento et al., 2007), and 144 predicted in this study. To remove redundant DNA motifs that were highly similar, we compared the similarity scores among the 896 DNA motifs (Figure S1A). The sequence similarity ( $S$ ) between two motifs,  $m1$  and  $m2$ , is defined as

$$S_{m1,m2} = \frac{s(m1,m2)}{\min(\text{length}(m1), \text{length}(m2))}, \quad (2)$$

where  $s(m1,m2)$  is the maximal number of matched nucleic acids between  $m1$  and  $m2$ . The value of  $S_{m1,m2}$  is equal to one if  $m1$  is identical to  $m2$ , or  $m1$  is a part of  $m2$  (or vice versa). The value of  $S_{m1,m2}$  is zero if  $m1$  and  $m2$  share no common nucleic acids.

We then compared the similarity between motif pairs and randomly removed one of the motifs if the similarity between the pair was greater than a defined cutoff value. This list consisted of 400 DNA motifs when we used a cutoff value of 0.9 (Figure S1B).

In addition to these predicted DNA motifs, we chose 60 DNA motifs from the TRNASFAC SITE (9.0) database (Wingender et al., 1996) that had known target TFs that were included in our protein chips.

## Protein Annotation

To define known TFs, we first searched the GO database for the human proteins associated with the GO terms, including: transcription factor activity (0003700), RNA polymerase II TF activity (0003702), RNA polymerase III TF activity (0003709), transcription activator activity (0016563), and transcription repressor activity (0016564) (Ashburner et al., 2000). In addition, on the basis of extensive literature search by expert biologists, we added well-known TFs that were not included in the GO database.

Transcriptional coregulators were excluded from the TF list and were annotated as a separate functional category. Predicted TFs were defined as proteins containing TF DNA-binding domains that were annotated by the Pfam database but had not been established as TFs on the basis of any experimental evidence (Table S13) (Finn et al., 2006). Protein kinases were annotated on the basis of the list from [www.kinase.com](http://www.kinase.com) (original paper published in Science 2002, updated in Dec, 2007) (Manning et al., 2002). In addition, we added protein kinases that had been verified experimentally by our labs. RNA-binding proteins were annotated based on the GO term “RNA binding” (0003723) and its offspring terms. Nucleic acid-binding proteins were defined as proteins that were associated with the GO term “nucleic acid binding” (0003676) and its offspring terms but were not in the TF and RNA binding list. Chromatin-associated proteins were annotated based on the GO term “chromosome organization and biogenesis” (0051276) and its offspring terms. Mitochondrial proteins were proteins whose cellular location is in the mitochondrion (data obtained from P. Onyango, personal communication). Proteins that were not annotated into the groups listed above were grouped into “all other categories,” and their molecular functions are summarized in Table S3. The version of GO database used was that from February 2008. All the annotations were checked manually and were corrected after searching the literature if any protein was mistakenly annotated by the GO database.

### **Protein Microarray Data Analysis**

*Image scan:* Protein microarray chips were scanned using GENEPIX PRO 5.0. We manually checked all the spots on the 460 chips and adjusted the size and position for the spots skewed by artifacts, such as dust or specks.

*Background correction:* To quantify the signal intensity for each spot, we calculated the signal intensity for each spot, which was defined as the foreground median intensity divided by its local background median intensity. A signal intensity close to 1 indicated that the protein in that spot did not bind to the DNA motif probe. The higher the signal intensity, the stronger the binding of that protein to the target DNA sequence.

*Within-chip normalization:* To eliminate spatial artifacts that can arise from uneven mixing of the probe or uneven washing and drying of the chips, we performed a within-chip normalization for each chip by assuming the signal distribution of all the blocks in a chip was consistent across the chip and the median signal intensity of each block was equal to 1. This assumption was based on the fact that the proteins were randomly printed on the chip, and only a small portion of the proteins (on average, <2%) bound to the target DNA sequences. Therefore, we normalized signal intensities ( $I$ ) of a set of spots within a block in a chip by setting the median intensity of that block equal to one,

$$\hat{I}_{i,j} = I_{i,j} - \text{median}(I_j) + 1, \quad (3)$$

where  $\hat{I}$  is the signal intensity after within-chip normalization,  $i$  is the protein index in a block, and  $j$  is the block index in the chip.

*Identifying positive hits:* To identify proteins that bind to a DNA motif probe (positive hits), an intensity cutoff value needed to be assigned for each chip. A cutoff was defined as a number of standard deviation(s) (SD) away from the mean of the signal intensities for all the spots in a chip, and spots producing a signal greater than the cutoff were identified as “positive hits.” However, it has been frequently observed that some spots have very strong signals in protein chips. In such cases, a cutoff value defined by the method described above would produce arbitrarily high values and yield high false-negative rates. To tackle this problem, we generated a signal intensity distribution for proteins without DNA-binding activity and determined the SD from their distribution.

We first identified the proteins with signal intensities less than one (left-hand side of the mean of the blue curve in Figure S19). Symmetric pseudo-data for the right side of the

mean were then generated to estimate the SD (right-hand side of the mean of the blue curve in Figure S19). Finally, we used a cutoff value of six SDs from the mean to identify positive hits (Table S4). Moreover, since each protein was printed in duplicate on a chip, a protein was counted as a positive hit only if both of its duplicated spots were identified as positive.

#### *Non-specific binding filtering*

We recognized that some proteins might bind to Cy5 directly and therefore produce signals in the absence of DNA motifs, and some proteins might bind to double-stranded T7 (the primer sequence) directly. To exclude these proteins from our list of “true” PDIs, we used four negative control experiments, assessing two chips probed with Cy5 only and two probed with T7 only. Any protein identified as a positive hit from one of these four experiments was filtered out from the target list for further data analysis. In total, 134 proteins were identified and eliminated on the basis of the negative control experiments.

#### **DNA Motif Logo Discovery**

We used AlignACE (Roth et al., 1998) to discover significant DNA motif logos. Multiple DNA logos were generated using a number of AlignACE parameters, including expect motif length or seed number, for each protein or for each protein family, in the case of generation of familial logos. The convergent logo was chosen. Degenerate DNA motif logos (significant nucleic acids were all separated in the logos) were excluded. Proteins bound to fewer than 30 motifs were considered “sequence-specific binding proteins” and were included in our further analysis.

#### **DNA Binding Motif Analysis of MAPK1**

We first searched for significant DNA binding motifs among the 17 DNA sequences (with spacers) bound by MAPK1 using AlignACE (Hughes et al., 2000), and we found a highly conserved position weight matrix (PWM), [G/C]AAA[C/G], comprising four possible variations: GAAAC, GAAAG, CAAAG, and CAAAC. To calculate whether

these motifs were enriched in the promoter regions of the up-regulated genes identified by the MAPK1-knockdown microarray, we retrieved promoter sequences of 82 genes (Xuan et al., 2005) in which the promoter region was defined as extending from -700 bp of the transcription start site (TSS) to 300 bp of the TSS. Enrichment analysis revealed that one of the MAPK1 binding motifs, GAAAC, was highly enriched in the promoter regions of these up-regulated genes ( $p=1.5e-9$ , hypergeometric test with the whole human promoter regions as background), whereas GAAAG showed weak enrichment ( $p=0.014$ ). On the other hand, CAAAG and CAAAC did not show any statistical enrichment ( $p=0.513$  and  $0.638$ , respectively). Application of MDscan (Liu et al., 2002) to the 82 promoter sequences revealed that GAAAC was the most significant potential DNA binding site, confirming the results from the enrichment analysis.

### Construction of the Correlation Network

We first defined the distance between the DNA-binding profiles of two proteins. The distance ( $D$ ) between the DNA-binding profiles of two proteins (A and B) was calculated according to

$$D_{A,B} = \left( \frac{\sum_{i=1,\dots,m} \left( 1 - \max_{j=1,\dots,n} (S(i, j)) \right)}{m} + \frac{\sum_{j=1,\dots,n} \left( 1 - \max_{i=1,\dots,m} (S(i, j)) \right)}{n} \right) / 2, \quad (4)$$

where  $S$  is the similarity score defined by Eq.2,  $m$  is the number of motifs to which protein A binds, and  $i$  is its motif index,  $n$  is the number of motifs to which protein B binds, and  $j$  is its motif index.

We then calculated the pairwise distance between the DNA-binding profiles for all the proteins showing specific binding activity (binding motifs  $<30$ ), including TFs and unconventional DNA binding proteins, according to Eq.4. The histogram of all the distances is shown in Figure S20. We arbitrarily chose a cutoff value of 0.1 to define proteins with highly correlated DNA binding profiles. All protein pairs with distances

less than 0.1 were then used to construct the network. The network was visualized using Cytoscape 2.6.0 (Cline et al., 2007).



## Supplemental Figures

A

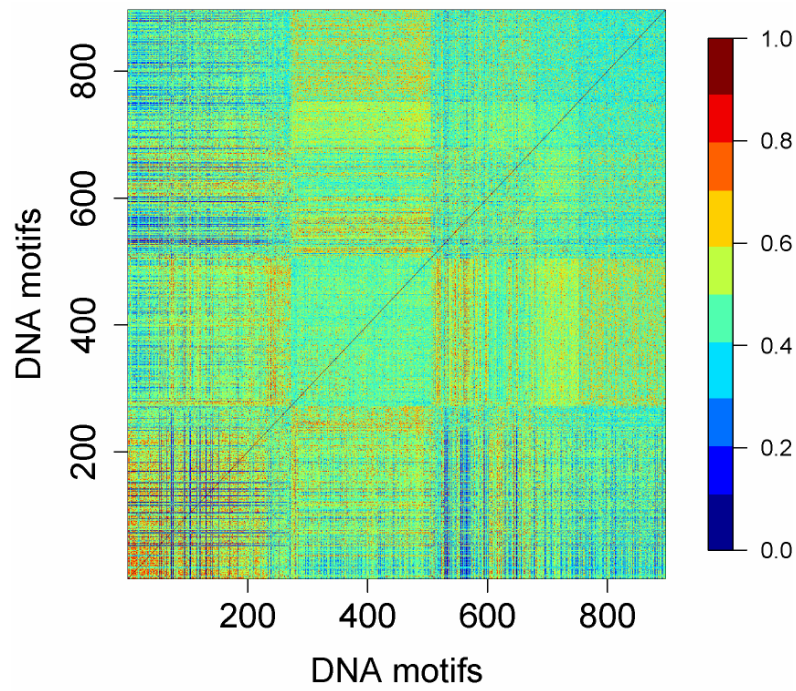

B

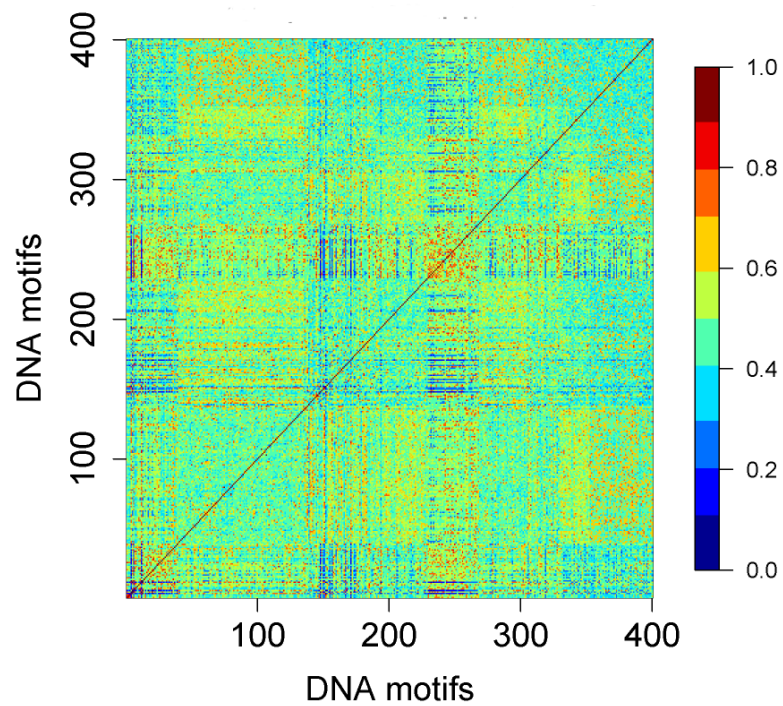

Figure S1. Heatmap of similarity scores between DNA motifs.

(A) Pairwise similarity scores for 896 input DNA motifs.

(B) Pairwise similarity scores for 400 DNA motifs after reduction.

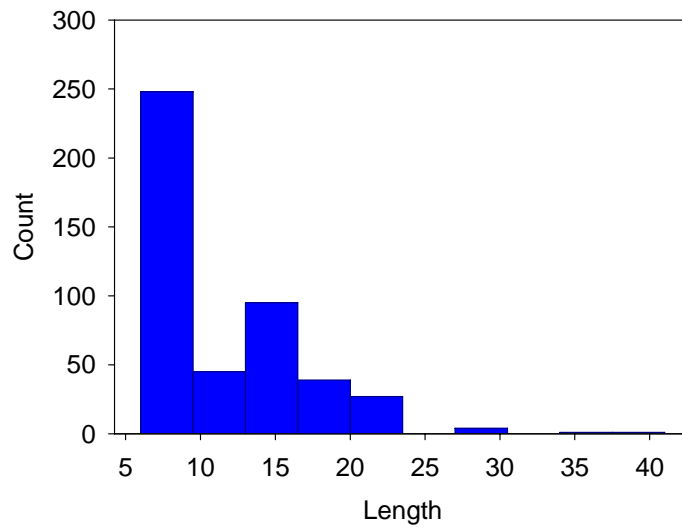

Figure S2. Histogram of motif length.

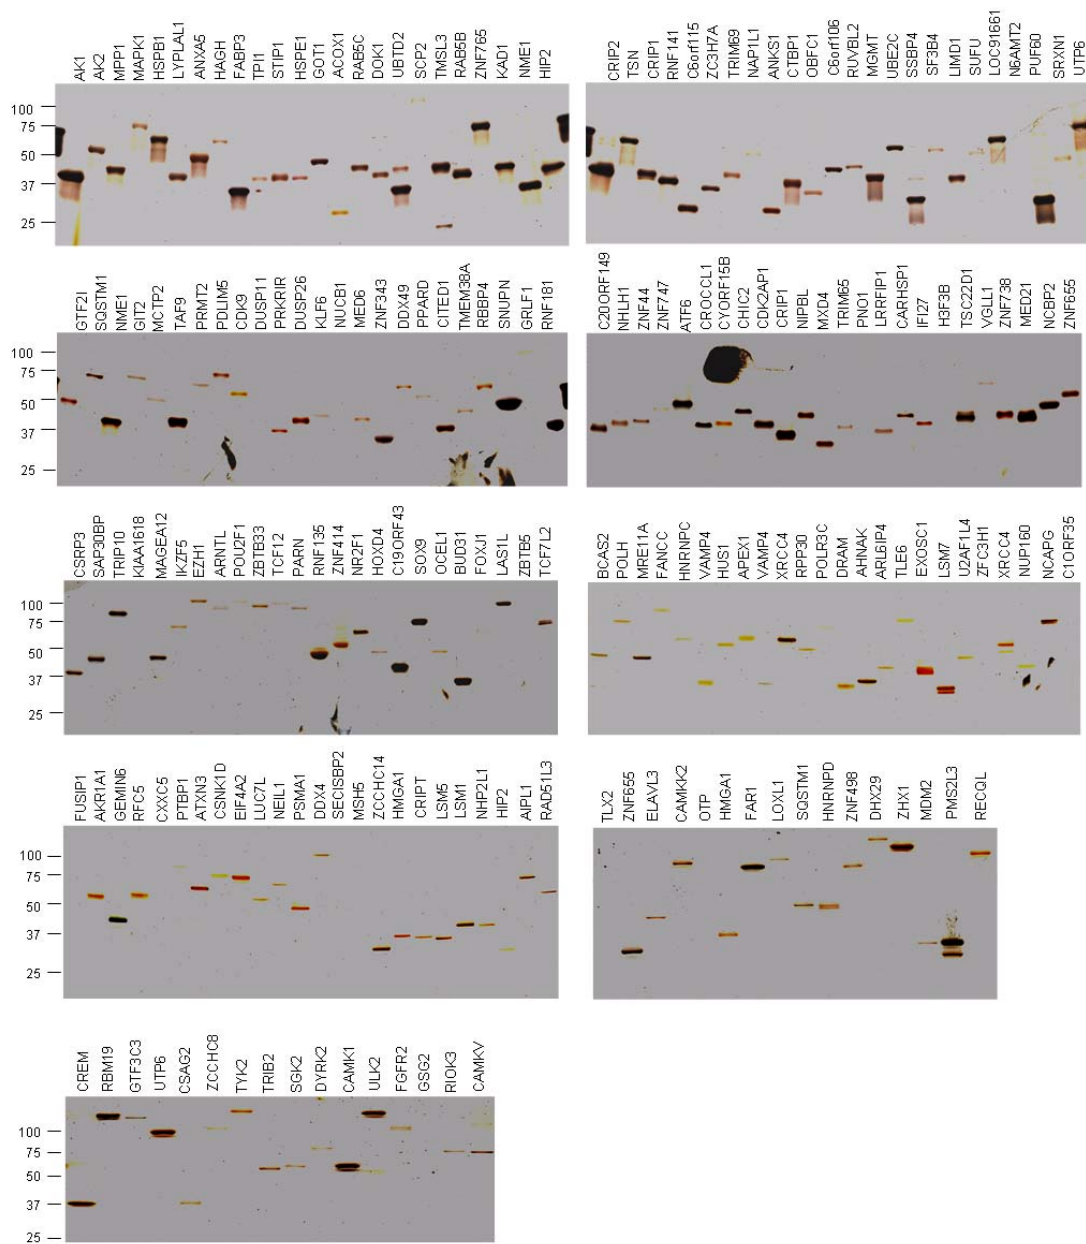

Figure S3. Silver staining analysis of 200 randomly selected human proteins purified from yeast. Molecular weights (kD) are indicated to the left.

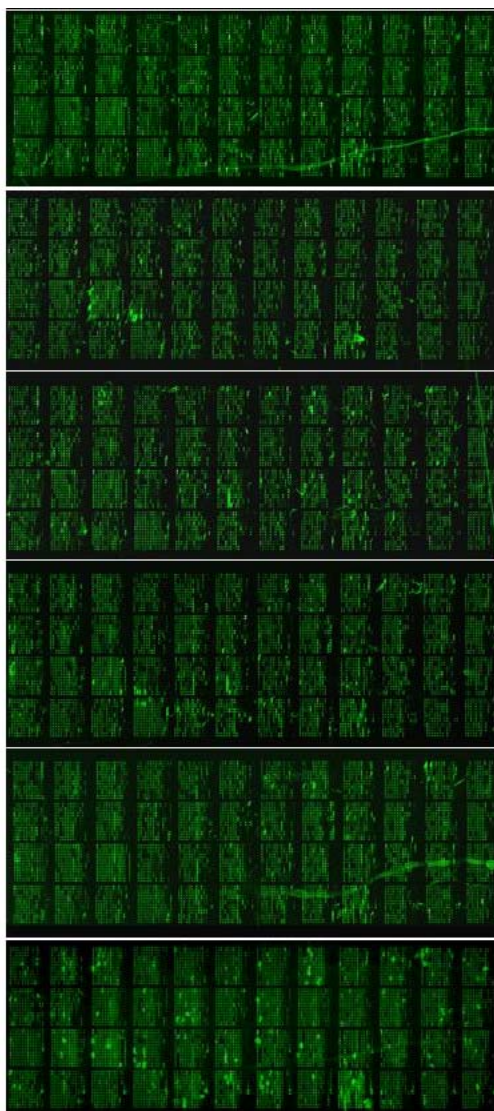

Figure S4. Protein microarrays probed with an anti-GST antibody. All the 4,191 non-redundant human proteins were printed in duplicates into 48 blocks. Anti-GST antibody was probed to check the quality of the microarrays. Proteins positively detected by the anti-GST antibody are represented in green and more than 98% of the spots on each microarray produced signals above background. Pairwise correlation coefficients of signal intensities between these slides ranged from 0.90–0.95. Each microarray contains 10,752 spots. The 4,191 proteins were printed in duplicate and occupied 8,382 spots. The rest spots either were printed with many control proteins (e.g., BSA, histones, IgGs, etc.) without GST tag, or left empty. Therefore, these spots were seen with extremely weak or no signal.

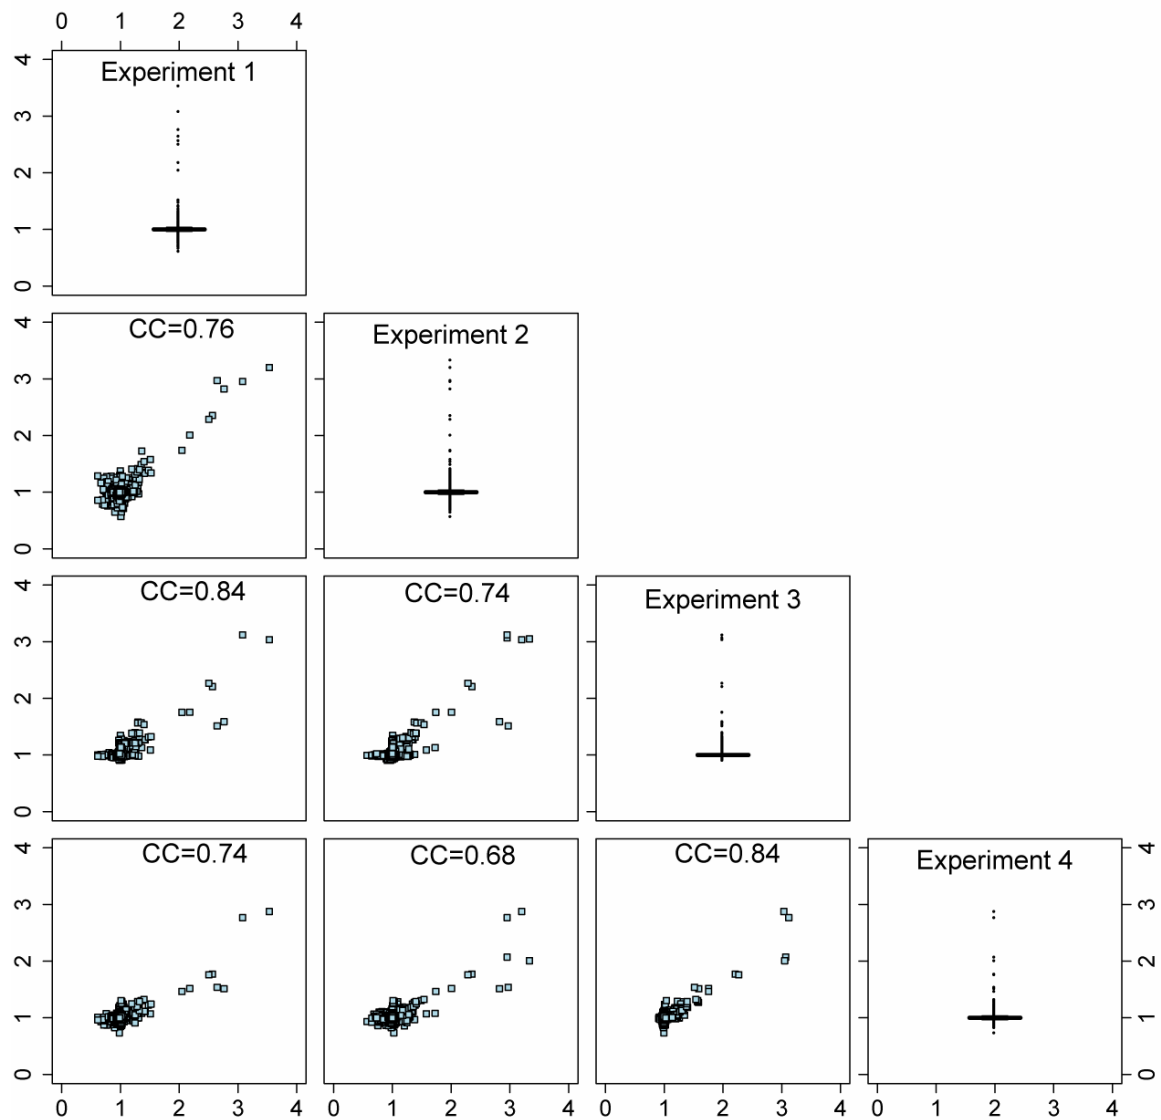

Figure S5. Boxplot and pairwise scatterplot of four replicated protein microarray experiments. Boxplot produces box-and-whisker plot of signal intensities (median foreground intensity / median background intensity) of a chip before normalization. Scatterplot compares the signal intensity of the spots between every two experiments. Each spot in the scatterplots represents one protein. X- and Y-axis are signal intensities. Note that the spots with high intensities are the positive hits. CC denotes correlation coefficient.

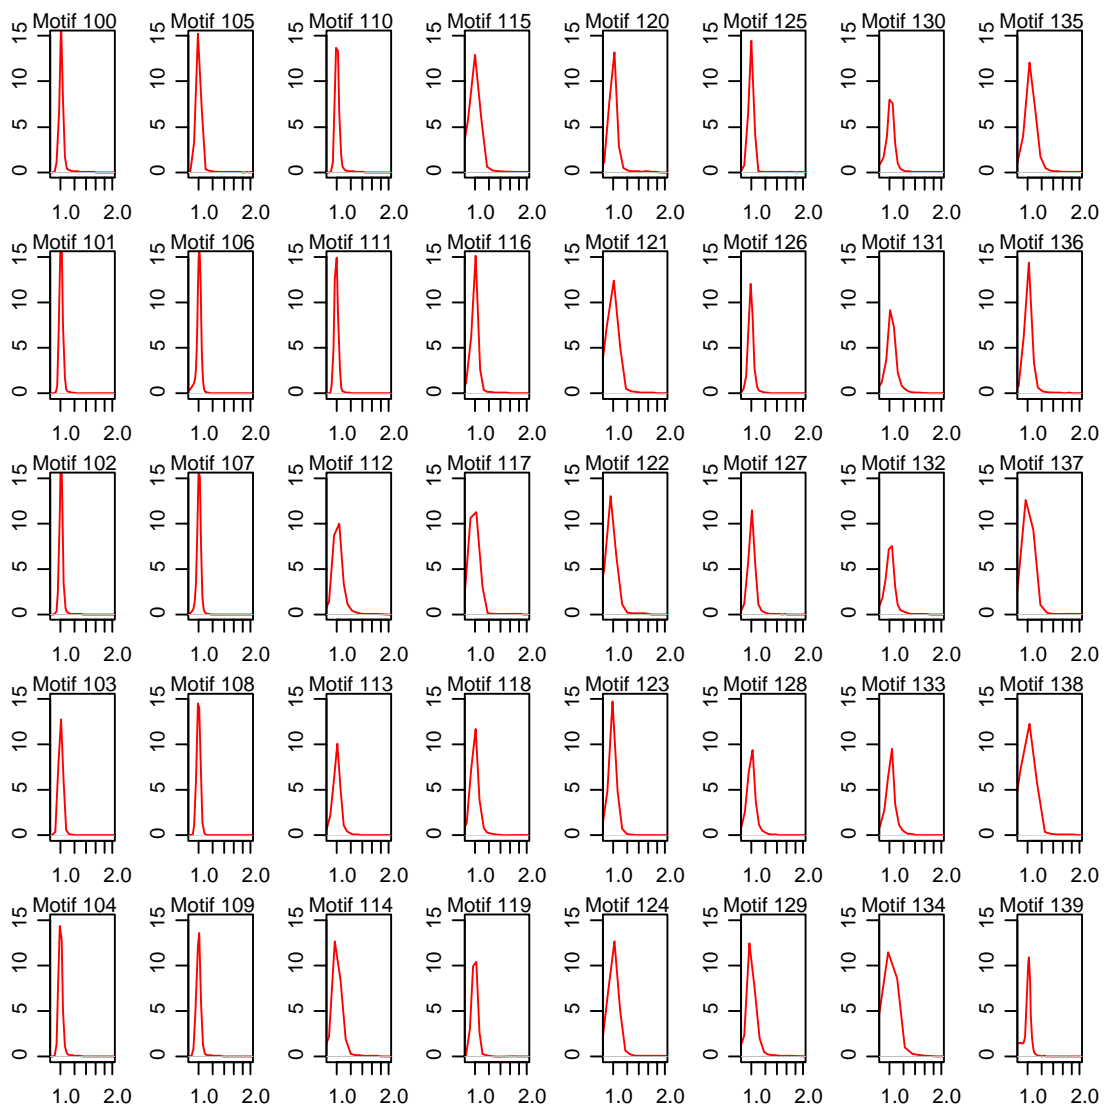

Figure S6. Density plots of signal intensity of 40 sample microarrays before normalization. The x-axis denotes signal intensity, and the y-axis denotes density of signal intensity.

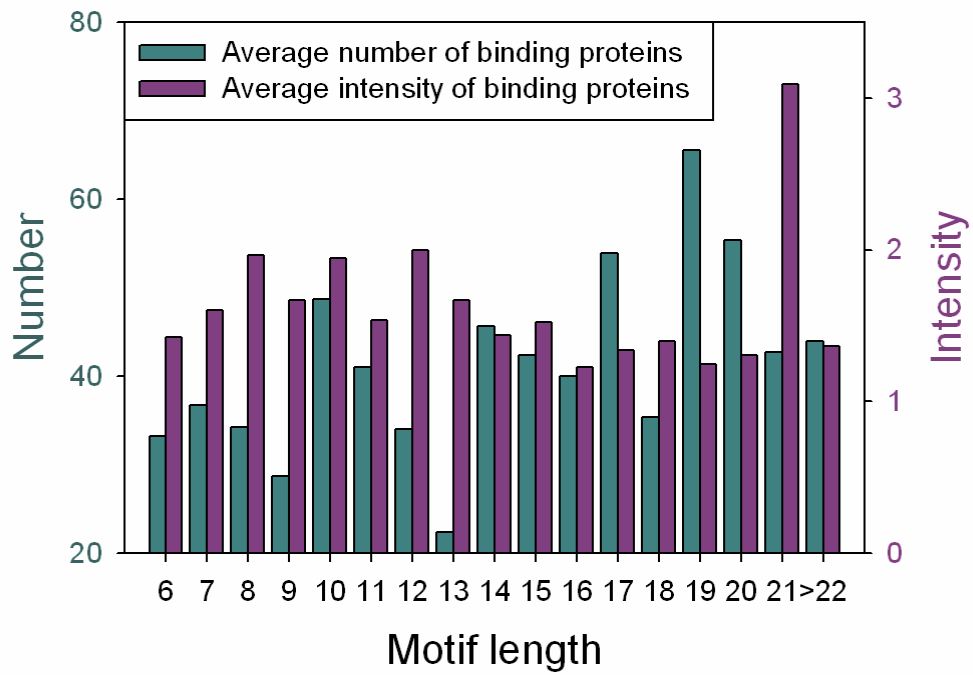

Figure S7. Motif length versus the number of binding proteins and the average signal intensity of binding proteins.

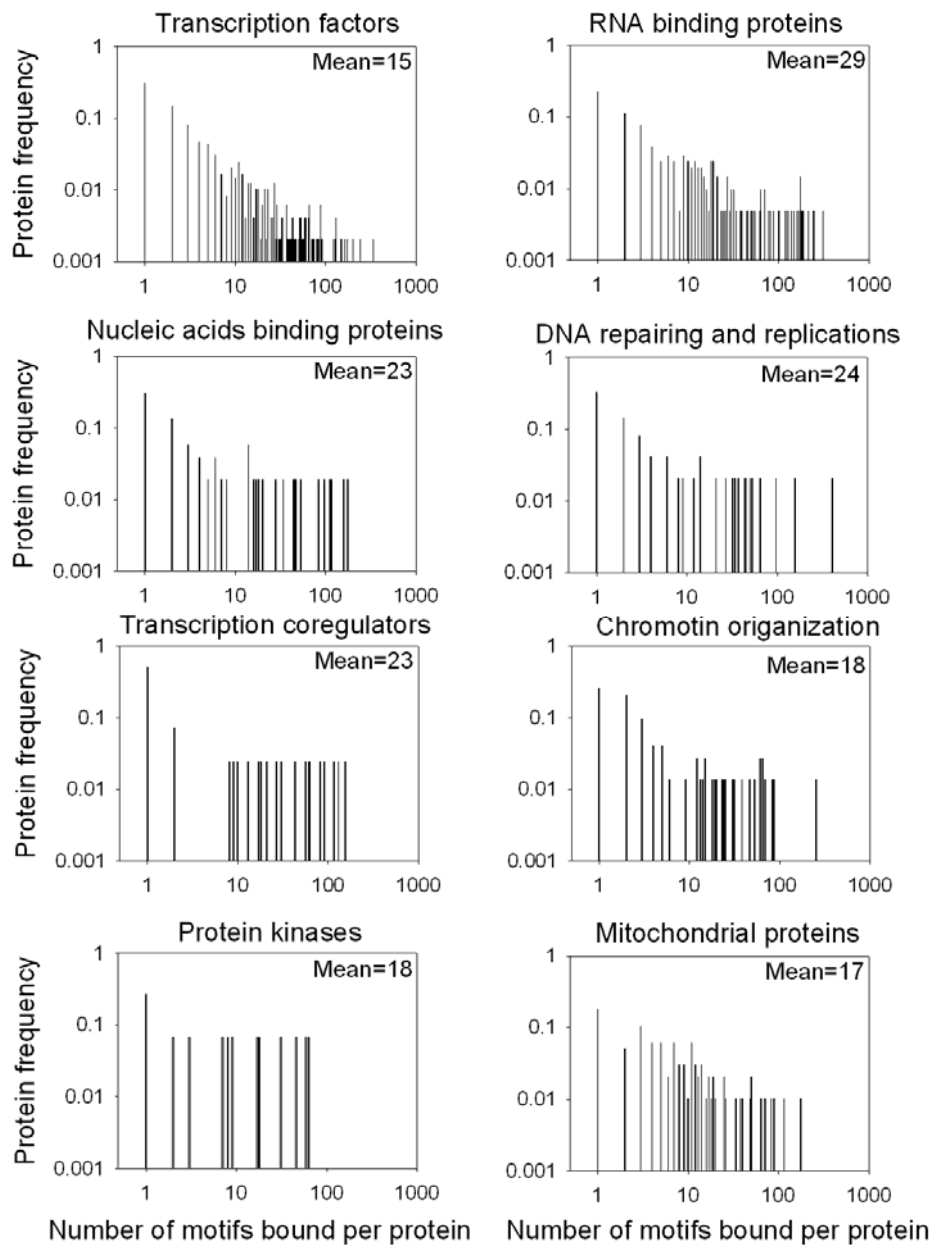

Figure S8. DNA binding specificity of different protein classes.



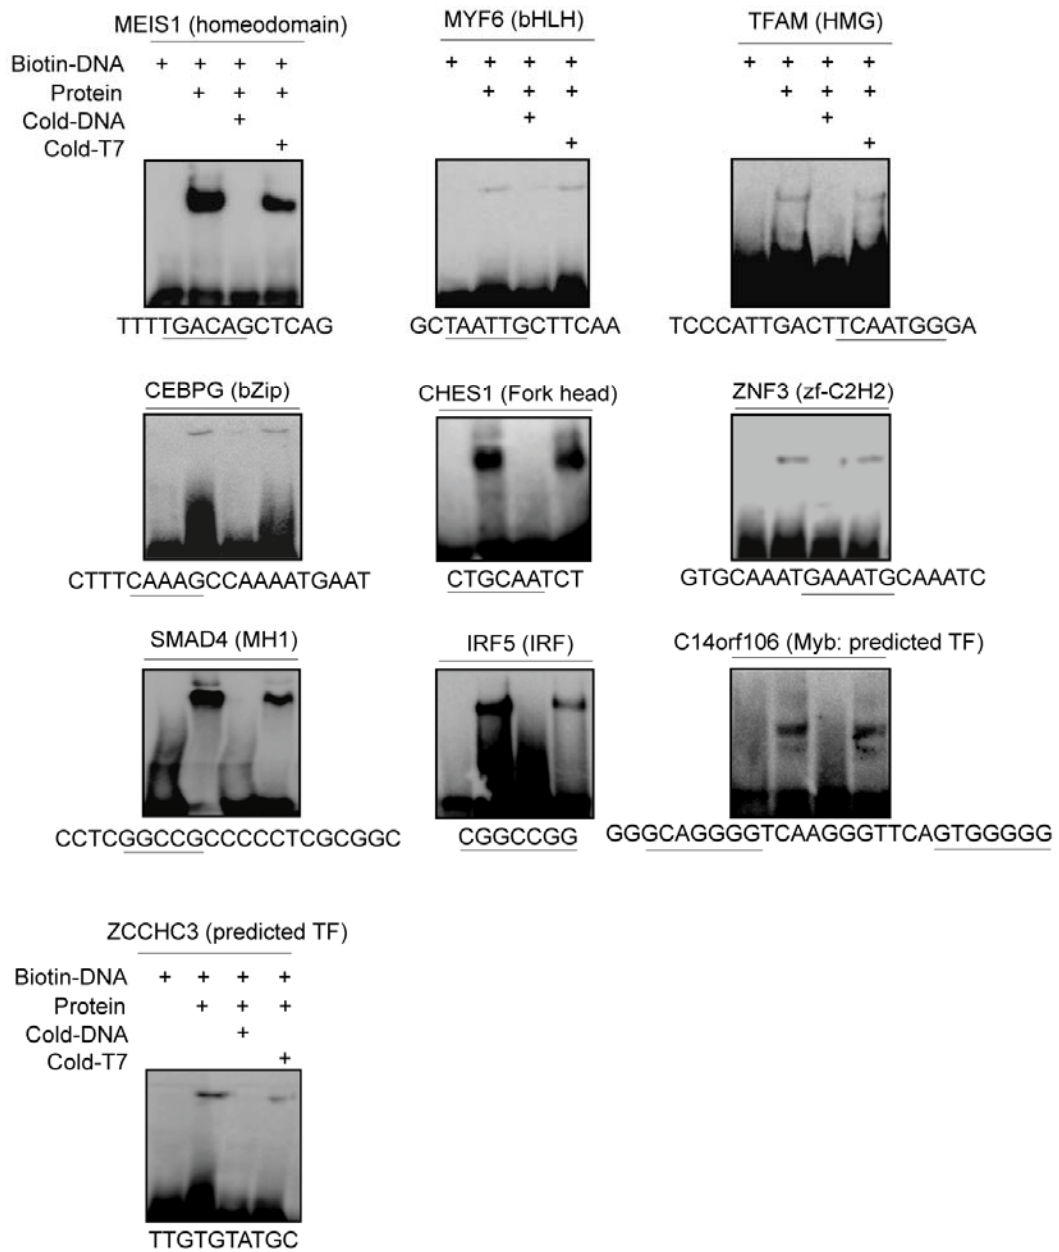

Figure S9. Validation of newly identified PDIs using EMSA analysis. Representative examples from the 9 subfamilies are shown, along with an example of a predicted TF that does not belong to any of these subfamilies.

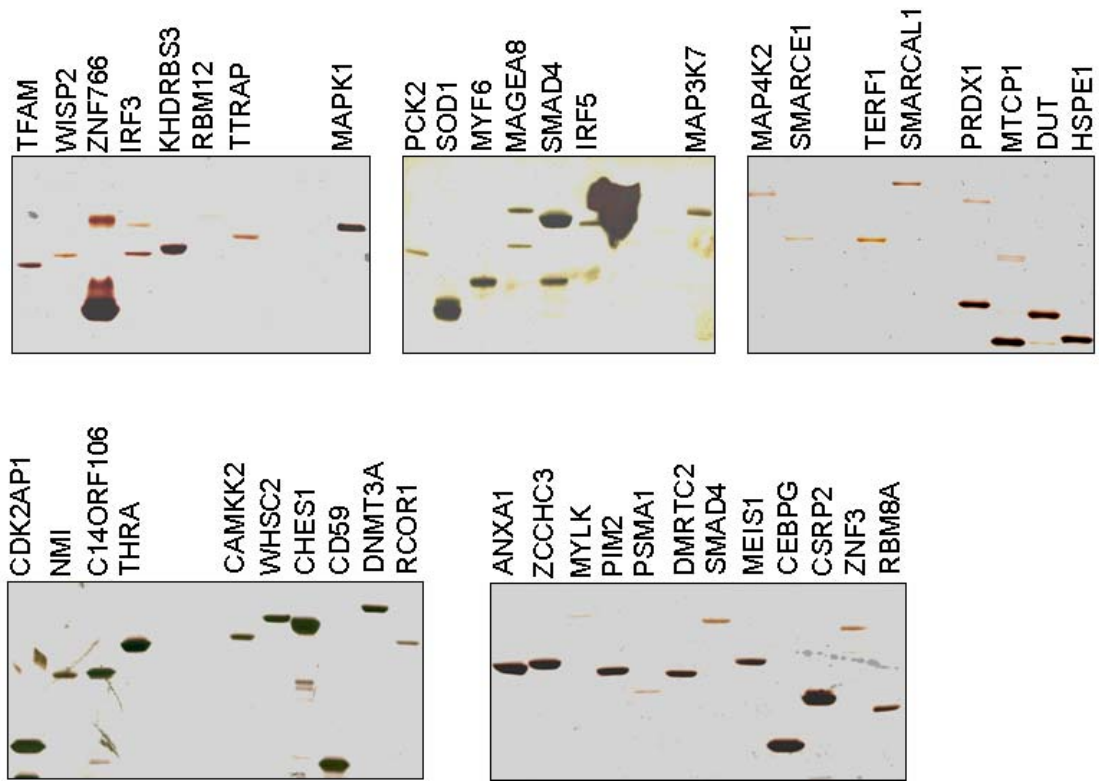

Figure S10. Silver staining images of proteins used in the EMSA assays.

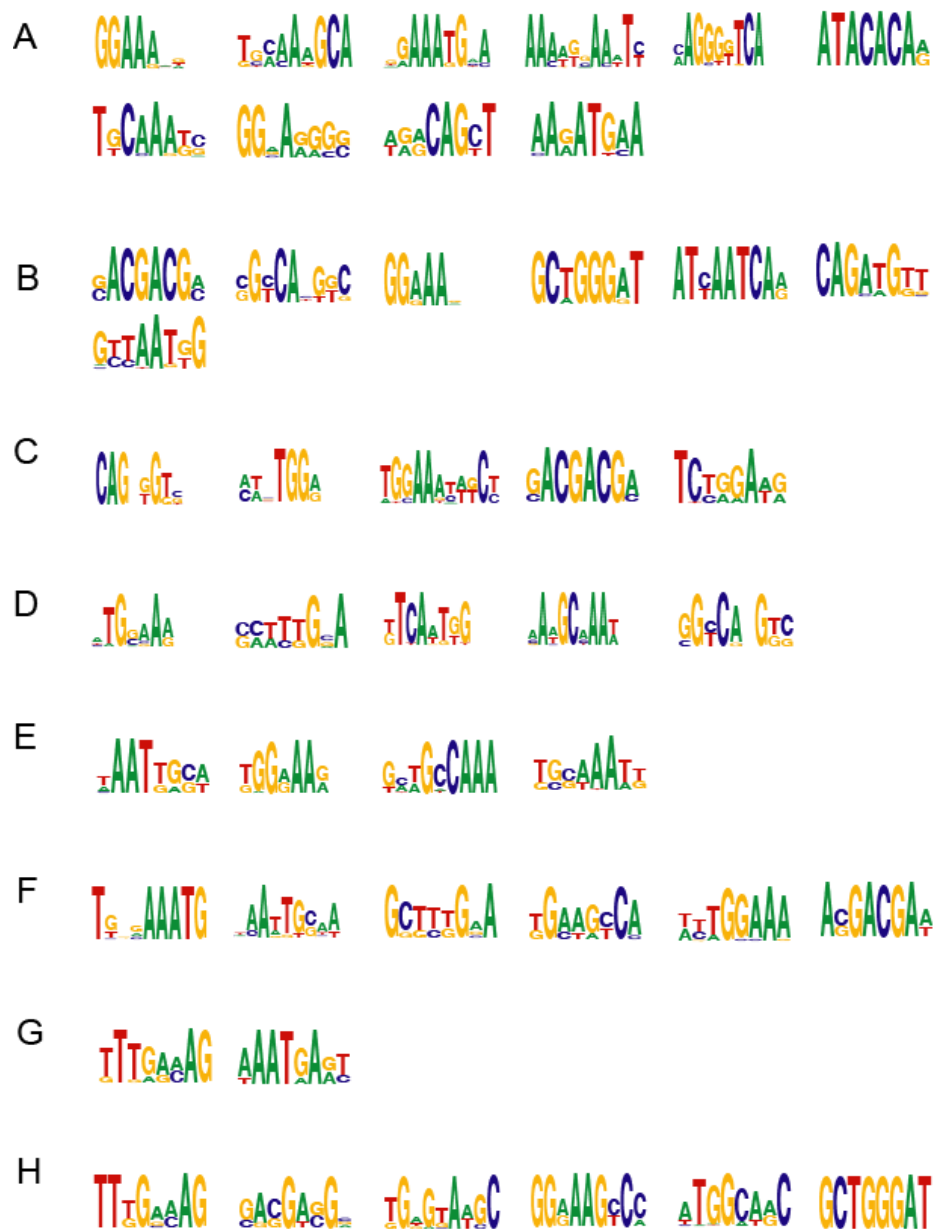

Figure S11. Significant familial logos of unconventional DNA binding proteins.

(A) RNA binding proteins.

(B) Mitochondria proteins.

(C) Chromatin associated proteins.

(D) Transcriptional coregulators.

(E) Proteins associated with DNA repairing and replications.

(F) Nucleic acid binding proteins.

(G) Protein kinases.

(H) All other categories.

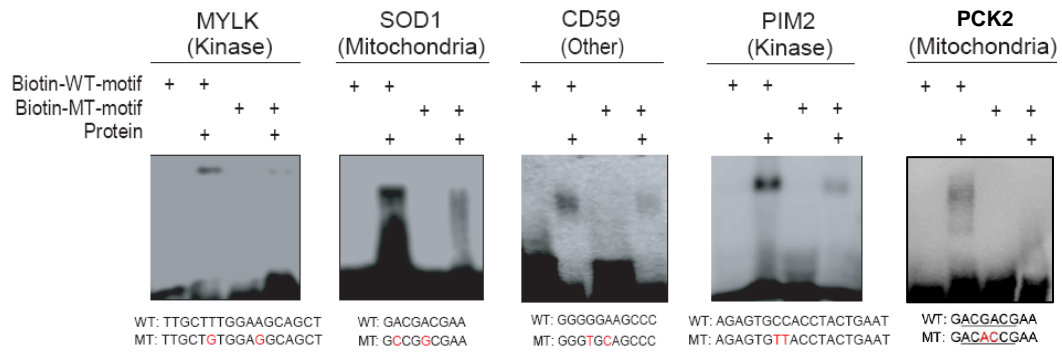

Figure S12. EMSA assays for four unconventional DNA-binding proteins. The mutant (MT) motifs for MYLK, SOD1, CD59, PIM2, and PCK2 showed significantly reduced binding activities compared to the wild-type (WT) motifs.

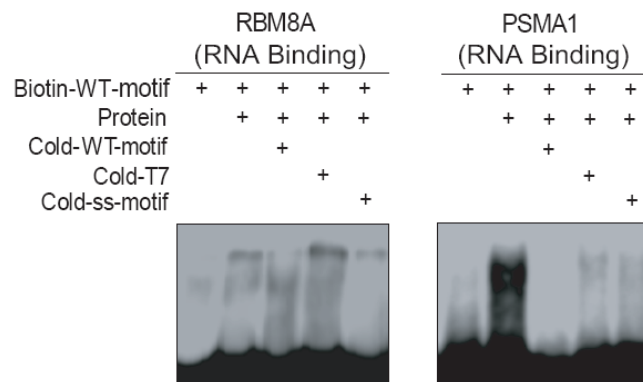

Figure S13. EMSA assays for RNA binding proteins RBM8A and PSMA1. Unlabeled dsDNA wild-type motifs efficiently competed for binding, while ssDNA had little effect.

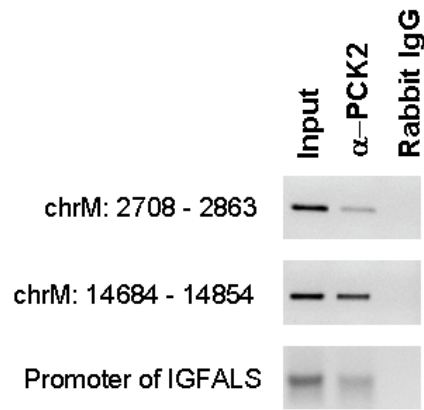

Figure S14. PCK2 is associated with DNA *in vivo* using ChIP coupled with PCR amplification. DNA fragments of PCK2-ChIPed mitochondrial DNAs are indicated as chrM: 2708 – 2863 and chrM: 14684 – 14854. PCK2 was also found to ChIP with the promoter of a chromosomal gene IGFALS.

|                 |   |   |   |
|-----------------|---|---|---|
| Biotin-WT-motif | + | + | + |
| Protein         | - | + | + |
| Staurosporine   | - | - | + |

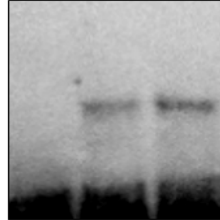

Figure S15. EMSA assay with *E. coli* purified MAPK1 co-expressed with MEK1. The presence of staurosporine, a kinase inhibitor, did not affect the DNA binding activity of MAPK1.

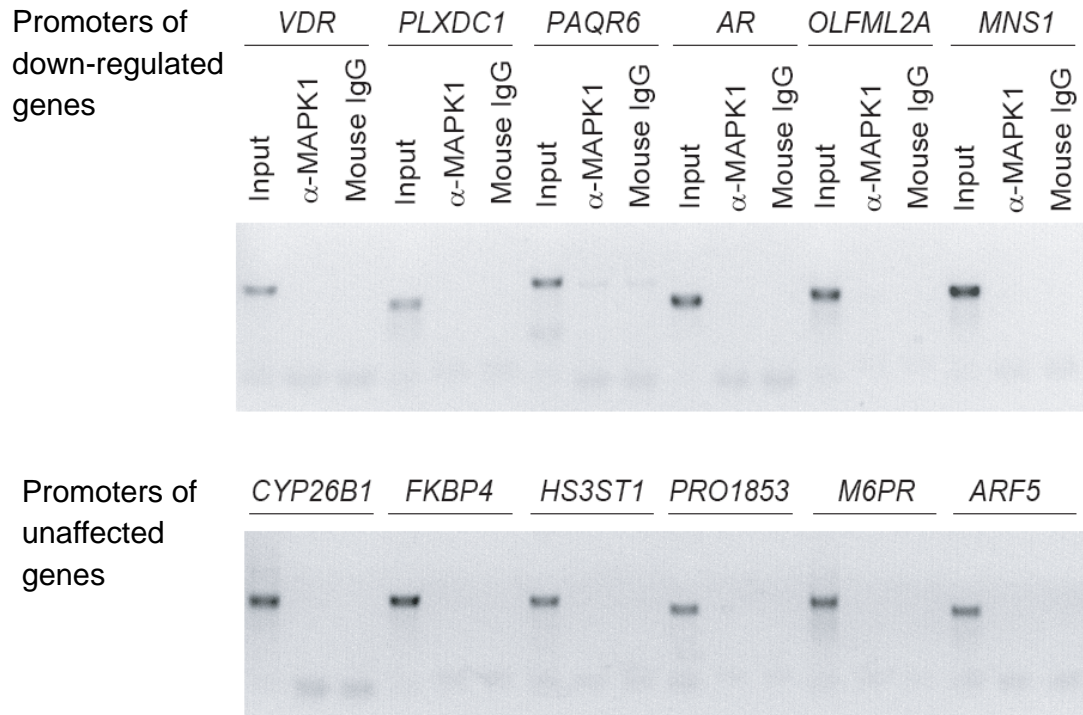

Figure S16. ChIP-PCR analysis of six down-regulated genes induced by MAPK1 knockdown and six unaffected genes. The anti-MAPK1 antibody did not show enrichment in any of these genes relative to the IgG control.



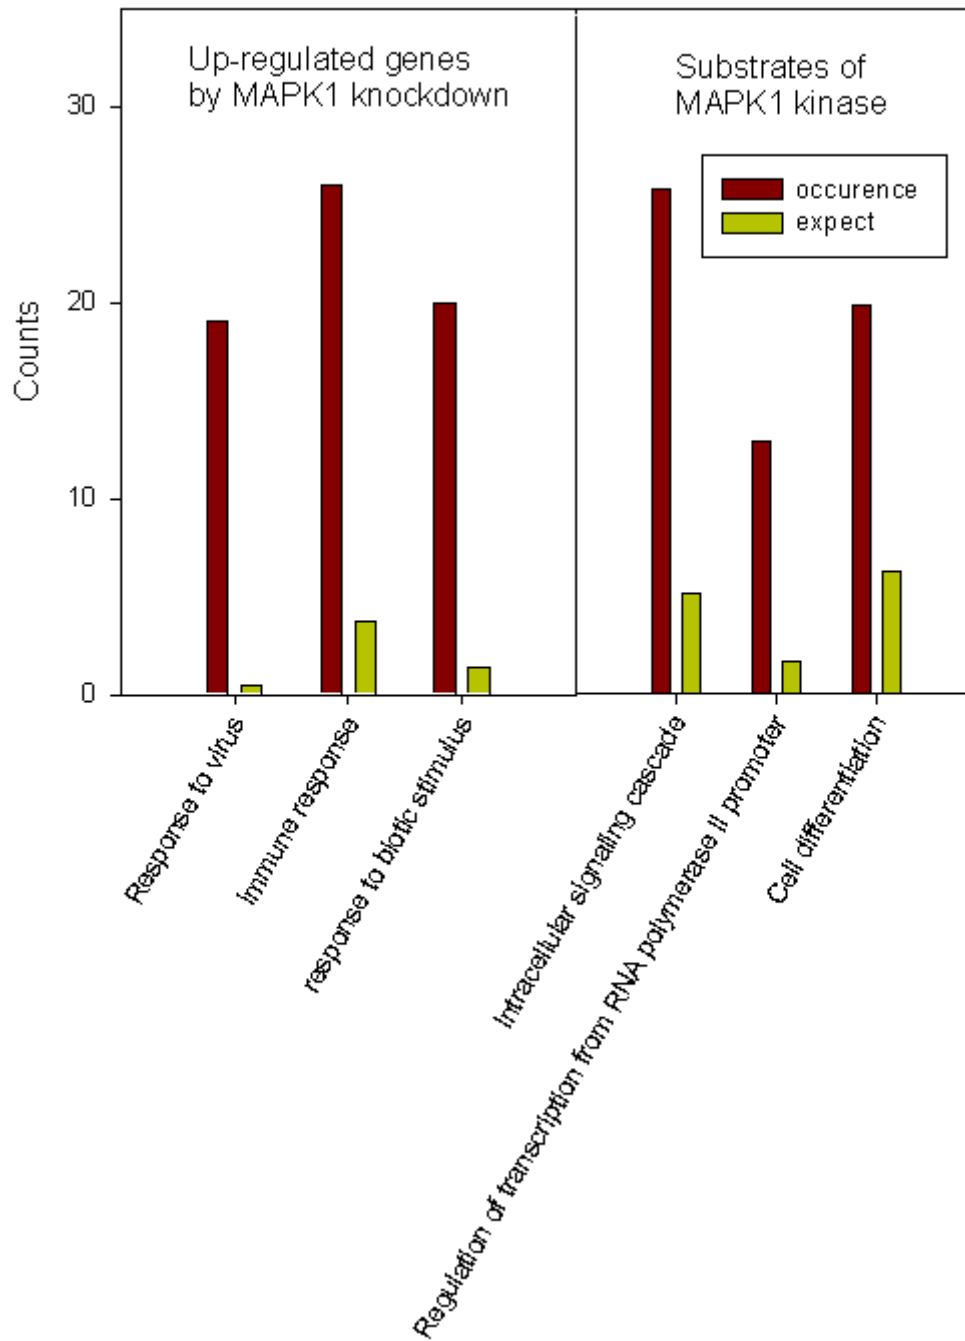

Figure S17. Significantly enriched GO terms of two gene sets, up-regulated genes by MAPK1 knockdown and substrates of MAPK1 kinase ( $p < 0.001$  using Fisher's exact test corrected for multiple testing).

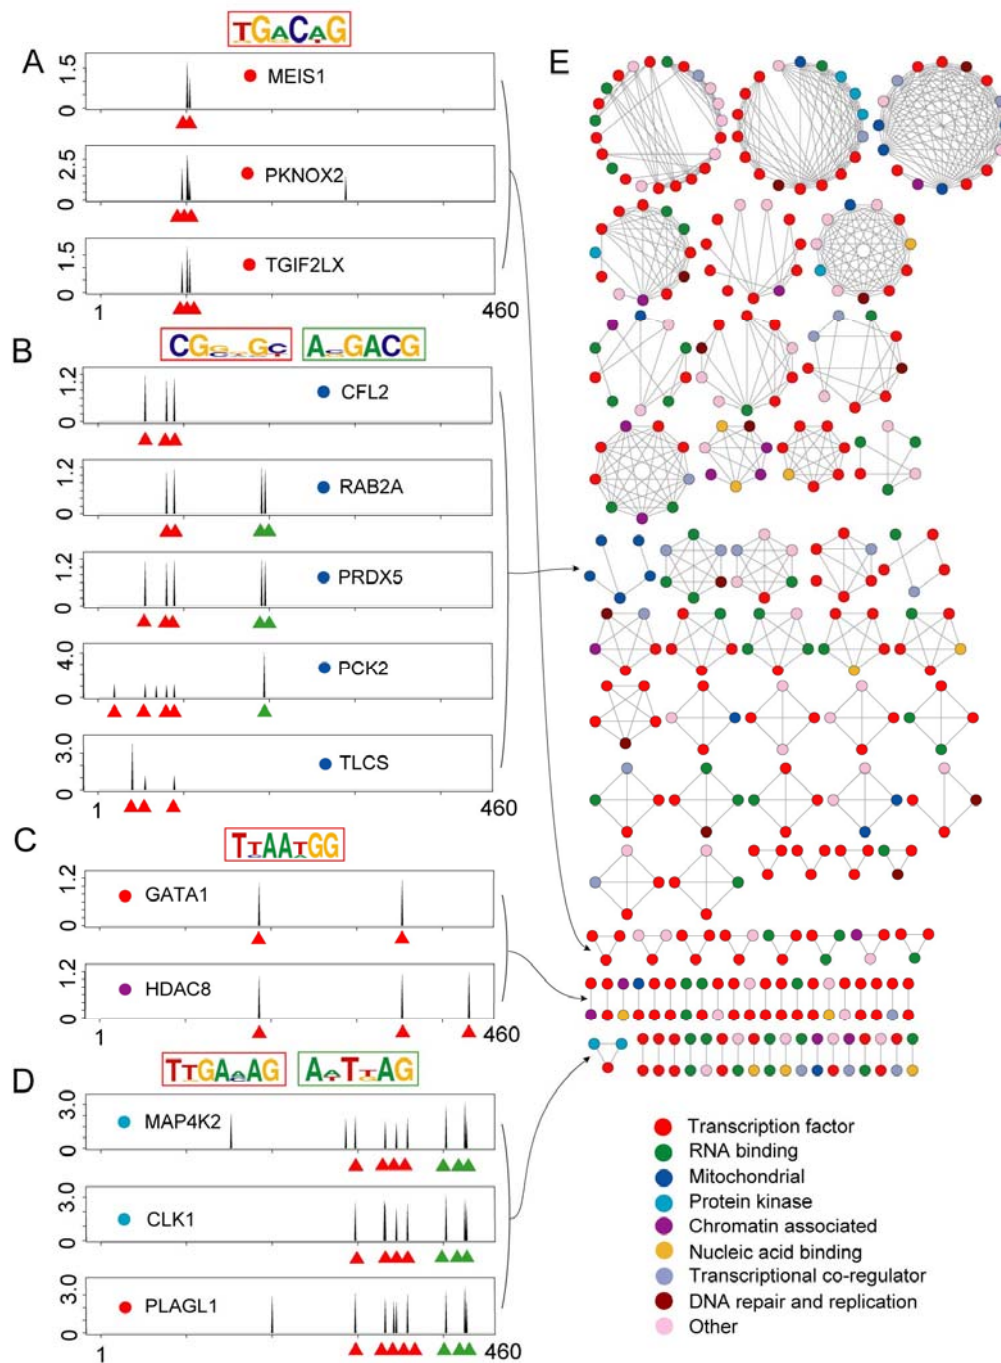

Figure S18. Correlation Network of the Target-Preference of All DNA-Binding Proteins Tested in the Study. (A-D) Examples of proteins sharing similar DNA binding profiles. Each peak represents the normalized signal intensity of a specific DNA motif probe, with individual motifs organized along the X-axis by sequence similarity. Binding peaks used to generate the major logo (outlined in red) are indicated by red triangles. For proteins that recognize more than one logo (outlined in green), binding peaks for the second logo are indicated in green. (E) Correlation network for proteins with highly similar DNA binding profiles (see Supplemental Data for construction of the network). Proteins of different function classes are color-coded. Proteins from different classes can share similar binding sites, indicating a potential crosstalk between unconventional DNA-binding proteins and annotated TFs.

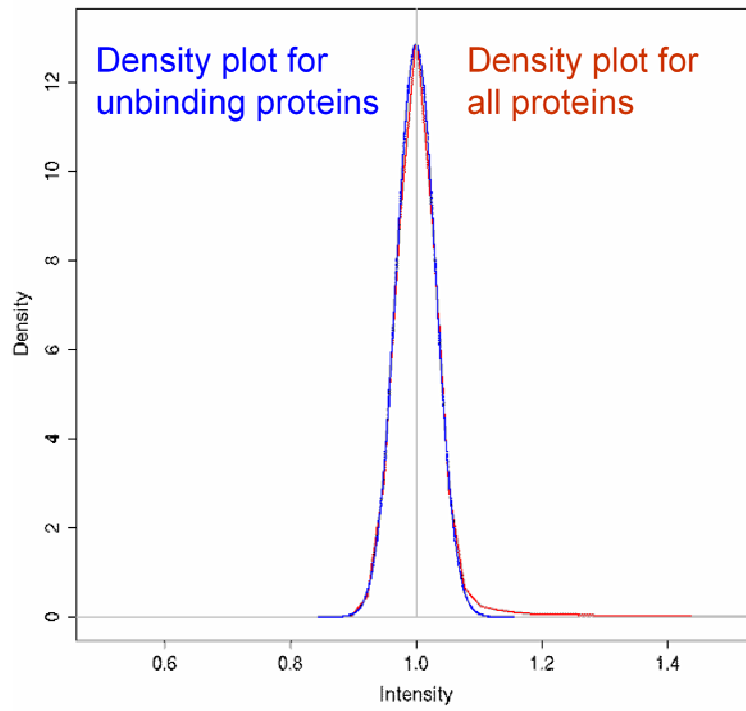

Figure S19. Density plot of signal intensity of all the spots in a protein microarray and that of negative hits in the microarray.

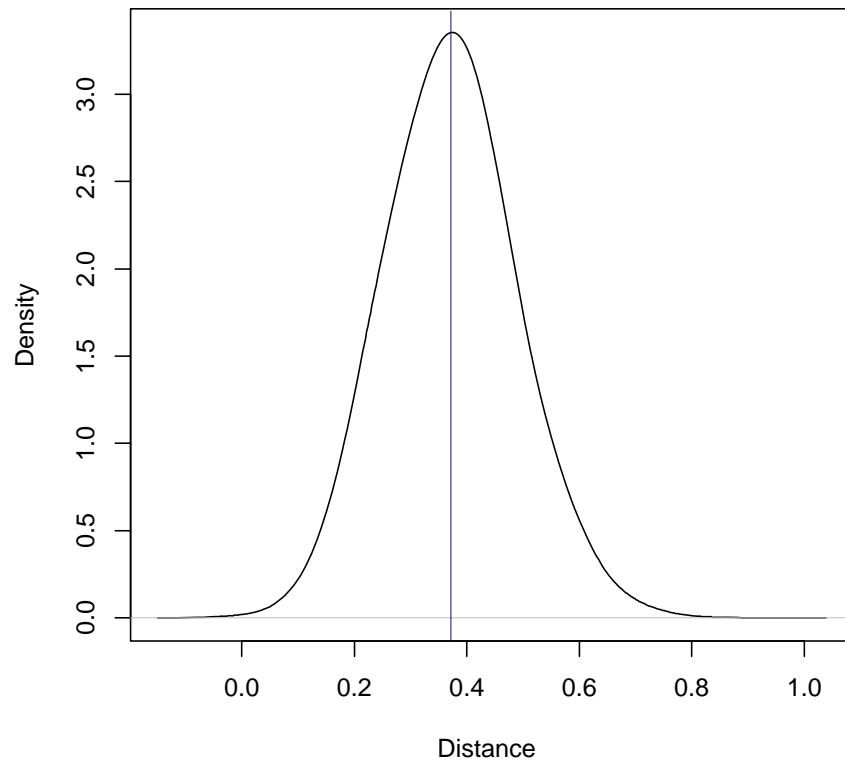

Figure S20. Histogram of the DNA-binding profile distance for all the proteins.

## **Supplemental Tables**

Table S1 (DNA\_motifs.xls) and Table S2 (Protein\_annotation.xls) are uploaded separately.

Table S3. Major molecular function categories of other classes of proteins annotated by the GO database. Note that some proteins have multiple GO terms.

| Molecular function                   | GO term    | Number of proteins |
|--------------------------------------|------------|--------------------|
| Metal ion binding                    | GO:0046872 | 127                |
| Receptor binding                     | GO:0005102 | 32                 |
| Catalytic activity                   | GO:0003824 | 138                |
| Enzyme regulator activity            | GO:0030234 | 44                 |
| Signal transducer activity           | GO:0004871 | 46                 |
| Transporter activity                 | GO:0005215 | 15                 |
| Other miscellaneous function protein |            | 107                |
| Molecular functions unclassified     |            | 181                |

Table S4. Estimation of the true-positive rate. In addition to the 60 known PDIs retrieved from the TRANSFAC SITE database, 11 predicted PDIs were also found to have been experimentally verified previously. In total, 71 PDIs were used for positive control to estimate the true positive rate. A cutoff value of six SD was chosen to keep true-positive rate high while minimizing possible false negatives. The relatively low true-positive rate (42.3%) likely reflects the fact that not all proteins on the array are correctly folded and that many TFs lack necessary cofactors for DNA binding.

|                                     |       |       |       |              |       |
|-------------------------------------|-------|-------|-------|--------------|-------|
| Standard deviation                  | 3     | 4     | 5     | <b>6</b>     | 7     |
| Number of recovered known PDIs (71) | 32    | 30    | 30    | <b>30</b>    | 28    |
| Recovery rate of known PDIs         | 0.451 | 0.423 | 0.423 | <b>0.423</b> | 0.394 |

Table S5. Consensus sequences (logos) identified for individual TFs

| TF name | No. of binding sequences |      | Logos | KLF3    | 22 | 1   |  |
|---------|--------------------------|------|-------|---------|----|-----|--|
|         | Protein TRANSFAC chip    | SITE |       |         |    |     |  |
|         |                          |      |       | ZBTB4   | 21 | 0   |  |
| HOXB9   | 29                       | 0    |       | ZNF655  | 21 | 0   |  |
| SSX3    | 29                       | 0    |       | CNOT6   | 21 | 0   |  |
| CREB1   | 29                       | 56   |       | RFXANK  | 21 | 0   |  |
| RAB18   | 28                       | 0    |       | RXRA    | 21 | 169 |  |
| ZNF26   | 27                       | 0    |       | JARID1D | 20 | 0   |  |
| PSMC2   | 27                       | 0    |       | ZNF3    | 20 | 0   |  |
| TRMT1   | 27                       | 0    |       | LAS1L   | 20 | 0   |  |
| SMAD4   | 27                       | 10   |       | CPSF4   | 19 | 0   |  |
| TFAP2C  | 27                       | 6    |       | TSNAX   | 18 | 0   |  |
| TP73    | 27                       | 4    |       | FHL2    | 18 | 0   |  |
| HHEX    | 26                       | 1    |       | ZBTB25  | 18 | 0   |  |
| TFAM    | 26                       | 1    |       | PHOX2A  | 18 | 5   |  |
| MYF6    | 25                       | 0    |       | ZHX3    | 17 | 0   |  |
| YEATS4  | 25                       | 0    |       | VSX1    | 17 | 0   |  |
| RFX4    | 23                       | 0    |       | JDP2    | 17 | 0   |  |
| MEIS3   | 23                       | 0    |       | ZBED1   | 17 | 0   |  |
| TFE3    | 23                       | 3    |       | POU3F2  | 17 | 19  |  |
| RARG    | 23                       | 2    |       | GTF3C2  | 16 | 0   |  |
| MLX     | 23                       | 1    |       | RAX     | 15 | 0   |  |



|        |    |    |  |        |    |    |  |
|--------|----|----|--|--------|----|----|--|
| SOX14  | 15 | 0  |  | ZNF124 | 11 | 0  |  |
| NME1   | 15 | 0  |  | AFF4   | 11 | 0  |  |
| NR2F1  | 15 | 62 |  | GTF2B  | 11 | 0  |  |
| ZNF238 | 15 | 22 |  | ZNF131 | 11 | 0  |  |
| ENO1   | 15 | 3  |  | HCLS1  | 11 | 0  |  |
| NKX2-3 | 14 | 0  |  | HIP2   | 11 | 0  |  |
| ZNF695 | 14 | 0  |  | TEAD1  | 11 | 11 |  |
| SND1   | 14 | 0  |  | USF2   | 11 | 4  |  |
| SCAND2 | 14 | 0  |  | THRA   | 11 | 3  |  |
| TRIM69 | 14 | 0  |  | SOX13  | 11 | 1  |  |
| PRRX1  | 14 | 1  |  | MEF2B  | 11 | 1  |  |
| OLIG3  | 13 | 0  |  | ZNF76  | 10 | 0  |  |
| TCEAL2 | 13 | 0  |  | EVX1   | 10 | 0  |  |
| IRF6   | 12 | 0  |  | POU4F3 | 10 | 0  |  |
| ZNF205 | 12 | 0  |  | PQBP1  | 10 | 0  |  |
| LARP1  | 12 | 0  |  | CCDC16 | 10 | 0  |  |
| RAN    | 12 | 0  |  | CHES1  | 10 | 0  |  |
| SNAPC5 | 12 | 0  |  | PAX3   | 10 | 2  |  |
| ZNF160 | 12 | 0  |  | BCL11A | 9  | 0  |  |
| MYEF2  | 12 | 0  |  | DLX6   | 9  | 0  |  |
| TGIF1  | 12 | 15 |  | HOXD3  | 9  | 0  |  |
| ZNF326 | 11 | 0  |  | ZNF720 | 9  | 0  |  |

|        |   |    |                                                                                     |          |   |    |                                                                                       |
|--------|---|----|-------------------------------------------------------------------------------------|----------|---|----|---------------------------------------------------------------------------------------|
| PDLIM5 | 9 | 0  |    | PIR      | 6 | 0  |    |
| PURG   | 9 | 0  |    | PRKRIR   | 6 | 0  |    |
| PAXIP1 | 9 | 0  |    | TULP1    | 6 | 0  |    |
| ETV4   | 9 | 10 |    | SSBP3    | 6 | 0  |    |
| NFATC3 | 9 | 2  |    | KCNIP1   | 6 | 0  |    |
| PLAGL1 | 9 | 1  |    | C19orf25 | 6 | 0  |    |
| NCALD  | 8 | 0  |    | TAF1A    | 6 | 0  |    |
| SCMH1  | 8 | 0  |    | ZNF250   | 6 | 0  |    |
| TCF3   | 8 | 67 |    | FOXMI    | 6 | 14 |    |
| SMAD3  | 8 | 23 |   | TFEB     | 6 | 4  |   |
| VAX2   | 7 | 0  |  | MYOD1    | 6 | 10 |  |
| HOXB13 | 7 | 0  |  | PITX1    | 5 | 0  |  |
| ZNF503 | 7 | 0  |  | PKNOX2   | 5 | 0  |  |
| SSX2   | 7 | 0  |  | LHX2     | 5 | 0  |  |
| USF1   | 7 | 68 |  | ESX1     | 5 | 0  |  |
| HSF1   | 7 | 19 |  | BARX1    | 5 | 0  |  |
| INSM1  | 7 | 11 |  | FOXP4    | 5 | 0  |  |
| KLF4   | 7 | 3  |  | CEBPG    | 5 | 0  |  |
| ZFP3   | 6 | 0  |  | NMRAL1   | 5 | 0  |  |
| SNAPC4 | 6 | 0  |  | MECP2    | 5 | 0  |  |
| MXD4   | 6 | 0  |  | OTUD4    | 5 | 0  |  |
| DDX20  | 6 | 0  |  | MAGED4   | 5 | 0  |  |

|         |   |    |  |         |   |    |  |
|---------|---|----|--|---------|---|----|--|
| MAGEF1  | 5 | 0  |  | LASS4   | 4 | 0  |  |
| ZNF385  | 5 | 0  |  | ZNF304  | 4 | 0  |  |
| HTATIP2 | 5 | 0  |  | ZNF207  | 4 | 0  |  |
| ZNF706  | 5 | 0  |  | THRAP6  | 4 | 0  |  |
| ELF2    | 5 | 7  |  | ETS1    | 4 | 44 |  |
| NR4A1   | 5 | 6  |  | IRF1    | 4 | 33 |  |
| ESRRA   | 5 | 5  |  | FLI1    | 4 | 3  |  |
| NFIL3   | 5 | 25 |  | RARA    | 4 | 50 |  |
| NFATC4  | 5 | 1  |  | SMAD2   | 4 | 2  |  |
| CBFB    | 5 | 1  |  | ARNTL   | 4 | 2  |  |
| HMG20A  | 4 | 0  |  | LHX4    | 4 | 1  |  |
| OLIG1   | 4 | 0  |  | ZNF71   | 3 | 0  |  |
| THAP5   | 4 | 0  |  | FEZF2   | 3 | 0  |  |
| ZBTB46  | 4 | 0  |  | RFX3    | 3 | 0  |  |
| ZBTB12  | 4 | 0  |  | TGIF2LX | 3 | 0  |  |
| BAD     | 4 | 0  |  | ID2     | 3 | 0  |  |
| PDCD11  | 4 | 0  |  | CREB3L1 | 3 | 0  |  |
| GTF2H3  | 4 | 0  |  | JARID1A | 3 | 0  |  |
| ZNF510  | 4 | 0  |  | ZBTB43  | 3 | 0  |  |
| ZNF323  | 4 | 0  |  | ZNF671  | 3 | 0  |  |
| TSC22D4 | 4 | 0  |  | RUFY3   | 3 | 0  |  |
| ZNF192  | 4 | 0  |  | HCFC2   | 3 | 0  |  |

|          |   |   |                                                   |         |   |     |                                                   |
|----------|---|---|---------------------------------------------------|---------|---|-----|---------------------------------------------------|
| PHTF1    | 3 | 0 | AA <sub>e</sub> TAA                               | NUCB1   | 3 | 0   | A <sub>T</sub> TGG <sub>AG</sub> GAA              |
| ZNF193   | 3 | 0 | TG <sub>CA</sub> AA <sub>T</sub>                  | POLE3   | 3 | 0   | ATG <sub>AA</sub> TG <sub>GC</sub>                |
| NFIX     | 3 | 0 | TGCAAA                                            | VPS4B   | 3 | 0   | GGGC <sub>AA</sub> GC                             |
| GRHL1    | 3 | 0 | AAG <sub>AT</sub> T <sub>TC</sub> A <sub>CG</sub> | ZCCHC14 | 3 | 0   | GGAG <sub>CG</sub>                                |
| RBBP5    | 3 | 0 | AG <sub>CA</sub> G <sub>TT</sub>                  | SF1     | 3 | 0   | TAAAA <sub>T</sub>                                |
| HES5     | 3 | 0 | CGCGTG <sub>GATT</sub>                            | GTF3C5  | 3 | 0   | GTGACC                                            |
| ASCC1    | 3 | 0 | G <sub>AA</sub> GGAG <sub>T</sub>                 | NFIB    | 3 | 0   | GC <sub>AA</sub> AA <sub>CG</sub>                 |
| CBFA2T2  | 3 | 0 | T <sub>TT</sub> GGAGC                             | FOSL1   | 3 | 5   | ATGA <sub>TC</sub> TC <sub>CA</sub>               |
| ZNF313   | 3 | 0 | AGGT <sub>CA</sub> A                              | RARB    | 3 | 9   | TATAAG                                            |
| COBRA1   | 3 | 0 | A <sub>T</sub> GG <sub>TC</sub> AA                | EBF1    | 3 | 9   | AAA <sub>CG</sub> GG                              |
| ZNF766   | 3 | 0 | AA <sub>CG</sub>                                  | TFAP2A  | 3 | 196 | T <sub>TC</sub> CG <sub>CA</sub> AA <sub>CA</sub> |
| TIMELESS | 3 | 0 | GACGA                                             | NR4A2   | 3 | 2   | A <sub>T</sub> TTGGA                              |
| TAF9     | 3 | 0 | CGTGG                                             | TBPL1   | 3 | 2   | G <sub>CA</sub> TTAA                              |
| HDAC8    | 3 | 0 | A <sub>GA</sub> TTAAT                             | NRL     | 3 | 1   | GC <sub>CA</sub> GA <sub>CG</sub>                 |

Table S6. Comparison between TF binding logos identified in this study and those listed in TRANSFAC SITE database.

| TF name | No. of binding motifs |               | DNA binding logo |               |
|---------|-----------------------|---------------|------------------|---------------|
|         | Protein chip          | Transfac site | Protein chip     | Transfac site |
| CREB1   | 29                    | 56            |                  |               |
| TP73    | 27                    | 4             |                  |               |
| SMAD4   | 27                    | 10            |                  |               |
| TFAP2C  | 27                    | 6             |                  |               |
| RXRA    | 21                    | 169           |                  |               |
| PHOX2A  | 18                    | 5             |                  |               |
| POU3F2  | 17                    | 19            |                  |               |
| ENO1    | 15                    | 3             |                  |               |
| NR2F1   | 15                    | 62            |                  |               |
| ZNF238  | 15                    | 22            |                  |               |
| TGIF1   | 12                    | 15            |                  |               |
| USF2    | 11                    | 4             |                  |               |
| THRA    | 11                    | 3             |                  |               |
| TEAD1   | 11                    | 11            |                  |               |
| ETV4    | 9                     | 10            |                  |               |
| TCF3    | 8                     | 67            |                  |               |
| SMAD3   | 8                     | 23            |                  |               |
| INSM1   | 7                     | 11            |                  |               |

|        |   |     |                                                |                                               |
|--------|---|-----|------------------------------------------------|-----------------------------------------------|
| USF1   | 7 | 68  | CACG <sub>g</sub> TG                           | CAC <sub>g</sub> TG                           |
| HSF1   | 7 | 19  | G <sub>e</sub> AC <sub>h</sub> TT <sub>g</sub> | T <sub>c</sub> AG <sub>g</sub> A <sub>s</sub> |
| TFEB   | 6 | 4   | CACG <sub>g</sub> G                            | G <sub>g</sub> TCACGTG                        |
| MYOD1  | 6 | 10  | TTAATG <sub>g</sub> A                          | eCAGgTG                                       |
| FOXM1  | 6 | 14  | T <sub>c</sub> CAAA                            | eCAAA <sub>g</sub> CA                         |
| ELF2   | 5 | 7   | cCGGAA <sub>g</sub>                            | CA <sub>g</sub> GAAG                          |
| ESRRA  | 5 | 5   | CAAGG <sub>g</sub> C                           | T <sub>c</sub> AG <sub>g</sub> TC             |
| NR4A1  | 5 | 6   | A <sub>g</sub> TG <sub>c</sub>                 | AAG <sub>g</sub> CA                           |
| NFIL3  | 5 | 25  | A <sub>g</sub> TGA <sub>e</sub> A              | TTA <sub>c</sub> GTAA                         |
| ETS1   | 4 | 44  | eGAAGT                                         | eGGAAG <sub>c</sub> T                         |
| FLI1   | 4 | 3   | cGGAA <sub>g</sub> T                           | eAGGA <sub>g</sub> T                          |
| IRF1   | 4 | 33  | TGAA <sub>g</sub> A                            | GAAA <sub>g</sub>                             |
| RARA   | 4 | 50  | G <sub>e</sub> CG <sub>c</sub> T               | AG <sub>g</sub> TCA                           |
| RARB   | 3 | 9   | TATAAG                                         | AG <sub>g</sub> TCA                           |
| TFAP2A | 3 | 196 | T <sub>c</sub> CGAAA <sub>g</sub>              | eCc <sub>g</sub> AGGc                         |
| FOSL1  | 3 | 5   | ATGA <sub>g</sub> TCA                          | TGA <sub>c</sub> TCA <sub>g</sub>             |
| EBF1   | 3 | 9   | AAA <sub>g</sub> GGG                           | Cc <sub>g</sub> GGG                           |

Table S7. Number of motifs shared by different TF subfamilies versus the expected numbers. Yellow background cells denote the number of motifs bound to the TF subfamily in the row. The number before “/” denotes the number of motifs shared. The number after “/” denotes the expected number of motifs shared. Green background cells indicate that shared motifs are over-represented by two subfamilies, where \*, \*\* and \*\*\* denote  $p$ -values <0.01, <0.001, and <0.00001, respectively.  $p$  values were calculated using the hypergeometric test.

|             |                 |                |               |              |        |       |             |          |       |       |       |     |  |  |
|-------------|-----------------|----------------|---------------|--------------|--------|-------|-------------|----------|-------|-------|-------|-----|--|--|
| zf-C2H2     | 206             |                |               |              |        |       |             |          |       |       |       |     |  |  |
| Homeodomain | 111/69.4<br>*** | 155            |               |              |        |       |             |          |       |       |       |     |  |  |
| bHLH        | 53/43           | 45/32.3<br>*   | 96            |              |        |       |             |          |       |       |       |     |  |  |
| NHR         | 49/36.3<br>*    | 38/27.3<br>*   | 20/16.9       | 81           |        |       |             |          |       |       |       |     |  |  |
| bZIP        | 48/31.3<br>**   | 44/23.6<br>*** | 20/14.6       | 20/12.3<br>* | 70     |       |             |          |       |       |       |     |  |  |
| HMG         | 42/26<br>***    | 43/19.5<br>*** | 24/12.1<br>** | 16/10.2      | 15/8.8 | 58    |             |          |       |       |       |     |  |  |
| MH          | 23/20.2         | 25/15.2<br>*   | 8/9.4         | 19/7.9<br>** | 8/6.8  | 4/5.7 | 45          |          |       |       |       |     |  |  |
| Forkhead    | 18/10.7<br>*    | 12/8.1         | 8/5           | 8/4.2        | 4/3.7  | 6/3   | 4/2.3       | 24       |       |       |       |     |  |  |
| IRF         | 13/7.6<br>*     | 10/5.7         | 3/3.5         | 5/3          | 6/2.6  | 1/2.1 | 5/1.7       | 2/0.9    | 17    |       |       |     |  |  |
| Ets         | 6/5.4           | 6/4            | 2/2.5         | 3/2.1        | 4/1.8  | 2/1.5 | 1/1.2       | 0/0.6    | 0/0.4 | 12    |       |     |  |  |
| Myb         | 8/5.4           | 5/4            | 2/2.5         | 3/2.1        | 1/1.8  | 0/1.5 | 6/1.2<br>** | 3/0.6    | 0/0.4 | 0/0.3 | 12    |     |  |  |
| RHD         | 8/4.5           | 7/3.4          | 3/2.1         | 4/1.8        | 2/1.5  | 2/1.3 | 2/1         | 2/0.5    | 2/0.4 | 1/0.3 | 0/0.3 | 10  |  |  |
|             | zf-C2H2         | Homeodomain    | bHLH          | NHR          | bZIP   | HMG   | MH          | Forkhead | IRF   | Ets   | Myb   | RHD |  |  |

Table S8. EMSA result for 31 novel PDIs. PTF denotes predicted TFs, and RBP denotes RNA-binding proteins.

| Gene symbol | Protein Class | DNA motif                    | EMSA results |
|-------------|---------------|------------------------------|--------------|
| TGIF2LX     | TF            | TTTTGACAGCTCAG               | +            |
| PKNOX1      | TF            | TTTTGACAGCTCAG               | +            |
| PKNOX2      | TF            | TTTTGACAGCTCAG               | +            |
| MEIS1       | TF            | TTTTGACAGCTCAG               | +            |
| MEIS2       | TF            | TTTTGACAGCTCAG               | +            |
| MEIS3       | TF            | TTTTGACAGCTCAG               | +            |
| SCML4       | TF            | TTTCCATCATAAATC              | +            |
| PAPD1       | TF            | ACTGAGCATGCTCAG              | -            |
| DSCR1       | TF            | GGAAAAGTCAAAGGG              | -            |
| NRL         | TF            | CCCGTGACC                    | +            |
| SMARCE1     | TF            | GGGCTTCCCC                   | +            |
| TTRAP       | TF            | CCCCTCCC                     | +            |
| IRF3        | TF            | GACATCTGGTTGCAATTG           | +            |
| CEBPG       | TF            | ATTCATTTGGCTTTGAAAG          | +            |
| CHES1       | TF            | CTGCAATCT                    | +            |
| ZNF3        | TF            | GATTTGCATTTCAATTGCAC         | +            |
| SNAPC4      | TF            | CCCCACTGAACCCTTGACCCCTGCCC   | -            |
| MYF6        | TF            | TTGAAGCAATTAGC               | +            |
| SMAD4       | TF            | CCTCGGCCGCCCCCTCGCGGC        | +            |
| IRF5        | TF            | CCGGCCG                      | +            |
| TFAM        | TF            | TCCCATTGACTTCAATGGGA         | +            |
| THRA        | TF & RBP      | CCCGTGACC                    | +            |
| ZCRB1       | PTF & RBP     | TCTGTGTAT                    | +            |
| RIPX        | PTF           | TCAAGTAACAGCAGGTGCAAAATAAAGT | +            |
| ZCCHC3      | PTF           | TTGTGTATGC                   | +            |
| TERF1       | PTF           | TTTCGCGC                     | -            |
| FUBP3       | PTF           | GATTTCTGTTGTG                | +            |
| ZNF261      | PTF           | GGGCTTCCCC                   | +            |
| ZNF765      | PTF           | GGGCTTCCCC                   | +            |
| C14orf106   | PTF           | CCCCACTGAACCCTTGACCCCTGCCC   | +            |
| ZNF766      | PTF           | GATTTGCATTTCAATTGCAC         | +            |



Table S9. Consensus sequences (logos) identified for uDBPs

| Protein   | No. of binding sequences | logo |
|-----------|--------------------------|------|
| C19orf40  | 20                       |      |
| TAGLN2    | 20                       |      |
| ZSWIM1    | 20                       |      |
| DIABLO    | 19                       |      |
| STUB1     | 19                       |      |
| HIST1H2BN | 19                       |      |
| U2AF1     | 19                       |      |
| DIS3      | 19                       |      |
| RPP25     | 19                       |      |
| RBM22     | 19                       |      |
| HNRPA1    | 18                       |      |
| TROVE2    | 18                       |      |
| BRUNOL6   | 18                       |      |
| IL24      | 18                       |      |
| MTHFD1    | 18                       |      |
| MYLK      | 18                       |      |
| MAGEA8    | 18                       |      |
| LOC653972 | 18                       |      |
| HNRPH3    | 18                       |      |
| MAPK1     | 17                       |      |
| ZMAT4     | 17                       |      |
| CSTF2     | 29                       |      |
| CDK2AP1   | 28                       |      |
| STAU2     | 27                       |      |
| RFC2      | 27                       |      |
| DAZAP1    | 27                       |      |
| DDX43     | 26                       |      |
| CAT       | 25                       |      |
| LARP4     | 25                       |      |
| HIST2H2AB | 24                       |      |
| LRRFIP1   | 24                       |      |
| RPL35     | 23                       |      |
| CBX7      | 23                       |      |
| TCEAL6    | 23                       |      |
| SFT2D1    | 22                       |      |
| HNRPC     | 21                       |      |
| DTL       | 21                       |      |
| FAM127B   | 21                       |      |
| USP39     | 21                       |      |
| SLC18A1   | 21                       |      |

|          |    |  |          |    |  |
|----------|----|--|----------|----|--|
| MRPS25   | 17 |  | SPR      | 13 |  |
| NMI      | 17 |  | NANOS1   | 13 |  |
| SCC-112  | 17 |  | TRIM21   | 13 |  |
| KIAA0907 | 16 |  | H2AFY    | 13 |  |
| TSN      | 16 |  | TRIP10   | 13 |  |
| SEMA4A   | 16 |  | MGC10433 | 13 |  |
| ODC1     | 16 |  | VAMP3    | 13 |  |
| EDN1     | 15 |  | ANXA1    | 13 |  |
| CCDC25   | 15 |  | PSMA6    | 13 |  |
| RKHD2    | 15 |  | GTPBP1   | 13 |  |
| MSI2     | 15 |  | ZDHC15   | 12 |  |
| TIMM8A   | 14 |  | MSI1     | 12 |  |
| TPPP     | 14 |  | RUVBL1   | 12 |  |
| APEX2    | 14 |  | NNT      | 12 |  |
| C2orf52  | 14 |  | DDEFL1   | 12 |  |
| MAGOH    | 14 |  | NXPH3    | 12 |  |
| RBM35B   | 14 |  | VIL2     | 12 |  |
| AKR1A1   | 14 |  | UQCRB    | 12 |  |
| RFC3     | 14 |  | HP1BP3   | 12 |  |
| ZCCHC17  | 14 |  | RBM35A   | 12 |  |
| PGAM2    | 14 |  | RAB14    | 11 |  |
| SMAP1L   | 13 |  | RPS4X    | 11 |  |

|          |    |  |          |   |  |
|----------|----|--|----------|---|--|
| GPD1     | 11 |  | AVEN     | 9 |  |
| RBM17    | 11 |  | RPL6     | 9 |  |
| UBB      | 11 |  | C9orf156 | 9 |  |
| MRPL1    | 11 |  | MAP4K2   | 9 |  |
| RPS10    | 10 |  | FIP1L1   | 9 |  |
| TIA1     | 10 |  | UTP18    | 9 |  |
| HNRPA0   | 10 |  | NOC2L    | 8 |  |
| LOC51035 | 10 |  | MBTPS2   | 8 |  |
| RBBP9    | 10 |  | ASPSR1   | 8 |  |
| HNRPLL   | 10 |  | MORN1    | 8 |  |
| CENTG1   | 10 |  | FLJ37078 | 8 |  |
| ANXA11   | 10 |  | PHLDA2   | 8 |  |
| PPP5C    | 10 |  | GRHPR    | 8 |  |
| BRUNOL5  | 9  |  | UBE2V1   | 8 |  |
| PTPMT1   | 9  |  | GPAM     | 8 |  |
| ADARB1   | 9  |  | MSRB3    | 8 |  |
| RAB7A    | 9  |  | CLK1     | 8 |  |
| SMPX     | 9  |  | R3HDM2   | 8 |  |
| MDM2     | 9  |  | RIOK2    | 7 |  |
| PIK3C3   | 9  |  | TIMM44   | 7 |  |
| BOLL     | 9  |  | PKM2     | 7 |  |
| TMSL3    | 9  |  | LUZP2    | 7 |  |

|         |   |          |        |   |           |
|---------|---|----------|--------|---|-----------|
| ZRSR2   | 7 | AAAT     | LUZP1  | 6 | GGGAG     |
| KIF22   | 7 | ATGAG    | SPAG7  | 6 | GCCACGTC  |
| DDX4    | 7 | GAAAT    | DAB2   | 6 | AAAGGA    |
| RBM3    | 7 | CATAA    | DHX36  | 6 | GGAAAT    |
| DUSP22  | 7 | ATGAAA   | RBM8A  | 5 | TGTGTA    |
| CKMT1B  | 7 | CATAA    | PICK1  | 5 | ITGCA     |
| P4HB    | 7 | GGCAC    | MORG1  | 5 | ATTAAATG  |
| MRPL2   | 7 | CAG      | ZDHHC5 | 5 | GAGGG     |
| AGGF1   | 7 | GGAGGT   | TOB2   | 5 | GGGCGC    |
| ETFB    | 7 | GAGAG    | HIRIP3 | 5 | GGCAAC    |
| PCK2    | 6 | CGCGT    | MCTP2  | 5 | GGAA      |
| DGCR8   | 6 | TGCAAA   | SF3B1  | 5 | GACAGAC   |
| ACO1    | 6 | AAACG    | CYCS   | 5 | CAAAcCCc  |
| H2AFZ   | 6 | CAGGA    | EIF5A2 | 5 | GTCACAGG  |
| ZC3H7A  | 6 | GGAAAGCC | EWSR1  | 5 | TAAATGAGC |
| WHSC2   | 6 | ATITGGA  | IVD    | 5 | AATCAGC   |
| UGP2    | 6 | CTGGAG   | TPI1   | 5 | GAAAGCG   |
| ACF     | 6 | TITGA    | CANX   | 5 | GTGCT     |
| NUP133  | 6 | AGTCA    | SUCLG1 | 5 | TAGAAAT   |
| HSPA5   | 6 | GGTGAAG  | WISP2  | 5 | AAAGCA    |
| GADD45A | 6 | TGAAAA   | PRDX5  | 5 | AGACG     |
| DUSP26  | 6 | GCAAAAGG | FGF19  | 5 | GAGCAG    |

|          |   |                                                    |         |   |                                                   |
|----------|---|----------------------------------------------------|---------|---|---------------------------------------------------|
| PDE6H    | 4 | TT <sub>c</sub> ATG <sub>c</sub> AG                | HHAT    | 3 | AGATT <sub>f</sub>                                |
| XRCC1    | 4 | AA <sub>A</sub> TT <sub>g</sub> TGC <sub>e</sub> T | NAP1L1  | 3 | cCAGG <sub>c</sub> C                              |
| EXOSC3   | 4 | T <sub>c</sub> GGAA                                | SOCS4   | 3 | T <sub>c</sub> GG <sub>A</sub> GA                 |
| RNF138   | 4 | A <sub>f</sub> TGAA                                | DR-1    | 3 | G <sub>A</sub> GGTC                               |
| DDX53    | 4 | TG <sub>e</sub> TGT                                | SRP9    | 3 | AA <sub>g</sub> GG <sub>c</sub> Gg <sub>c</sub> C |
| ECSIT    | 4 | GAA <sub>e</sub> TAG                               | YWHAZ   | 3 | T <sub>cc</sub> GG <sub>A</sub> T                 |
| HSPA1L   | 4 | TG <sub>c</sub> CAG                                | XG      | 3 | AT <sub>g</sub> ATG <sub>g</sub> AA               |
| C1orf176 | 4 | AA <sub>A</sub> A <sub>T</sub> GC                  | NONO    | 3 | GG <sub>c</sub> TTTG                              |
| DNMT3A   | 4 | CG <sub>A</sub> CA <sub>T</sub> GC                 | SRBD1   | 3 | TGC <sub>e</sub> AAA <sub>T</sub>                 |
| RAB2A    | 4 | G <sub>A</sub> CC <sub>c</sub> AT                  | GOT1    | 3 | CA <sub>c</sub> G <sub>A</sub> CG                 |
| SNRP70   | 4 | A <sub>c</sub> TAA <sub>A</sub> TT                 | MSRA    | 3 | GACGAT                                            |
| PTCD1    | 4 | G <sub>f</sub> GT <sub>e</sub> A <sub>g</sub> GT   | ZMAT2   | 3 | G <sub>c</sub> AGGG                               |
| GLYCK    | 4 | AAA <sub>T</sub> GA <sub>T</sub> AT                | H1FX    | 3 | C <sub>T</sub> GG <sub>A</sub> AAA                |
| PLG      | 4 | G <sub>c</sub> ACAGA                               | RPS6KA5 | 3 | GAC <sub>g</sub> AA <sub>c</sub> C                |
| NCBP2    | 4 | GAC <sub>c</sub> TG                                | SPATS2  | 3 | G <sub>e</sub> AAAA <sub>f</sub>                  |
| SMCR7L   | 4 | T <sub>f</sub> CC <sub>A</sub> AAA <sub>f</sub>    | SNRPB2  | 3 | C <sub>A</sub> AGCAC <sub>AA</sub> CT             |
| RBMS1    | 4 | AAT <sub>f</sub> A <sub>T</sub> GCA                | CYB5R1  | 3 | T <sub>cc</sub> GA <sub>T</sub> AC                |
| NOLA1    | 4 | AG <sub>cc</sub> AAAT                              | SMUG1   | 3 | C <sub>g</sub> TGG <sub>A</sub> AA                |
| ABCF2    | 4 | G <sub>cc</sub> AAA <sub>T</sub> C                 | YWHAE   | 3 | GG <sub>A</sub> C <sub>T</sub> GA <sub>T</sub>    |
| RNASEH2C | 3 | TT <sub>c</sub> G <sub>g</sub> GA <sub>c</sub>     | SOD1    | 3 | GAGC <sub>c</sub>                                 |
| PRNP     | 3 | CCGA <sub>A</sub>                                  | HLCS    | 3 | GGCAG                                             |
| POLI     | 3 | A <sub>g</sub> AGCC                                | CSNK2B  | 3 | G <sub>f</sub> AAAA <sub>c</sub> G                |

|           |   |                                                    |
|-----------|---|----------------------------------------------------|
| HIST2H2BE | 3 | TGGAA <sub>ec</sub> TTT <sub>AG</sub>              |
| PPP2R3B   | 3 | G <sub>ca</sub> AAA <sub>Tca</sub>                 |
| EEF1D     | 3 | TG <sub>c</sub> CA <sub>g</sub> GAA <sub>Tca</sub> |
| ING3      | 3 | G <sub>a</sub> GTC <sub>Tc</sub>                   |
| MGC10334  | 3 | G <sub>c</sub> AAGC                                |
| NUP107    | 3 | AA <sub>g</sub> TGC <sub>ec</sub>                  |
| BAX       | 3 | G <sub>a</sub> CA <sub>g</sub> C <sub>Tca</sub>    |
| FAM119B   | 3 | AAAT <sub>ca</sub> <sub>ec</sub>                   |
| RBM7      | 3 | AG <sub>c</sub> AAG                                |
| BAT4      | 3 | GAATA <sub>GT</sub>                                |

|         |   |                                                     |
|---------|---|-----------------------------------------------------|
| CFL2    | 3 | CGG <sub>gg</sub> T <sub>TT</sub>                   |
| LSM6    | 3 | ATG <sub>ca</sub> AAA <sub>Tca</sub>                |
| CD59    | 3 | GG <sub>g</sub> AAAG <sub>ca</sub> C <sub>Tca</sub> |
| ARFGAP1 | 3 | CATG <sub>g</sub> C <sub>Tca</sub>                  |
| BRUNOL4 | 3 | GTG <sub>ca</sub> AA <sub>Tca</sub>                 |
| GIT2    | 3 | TTG <sub>ca</sub> AA <sub>Tca</sub>                 |
| GTPBP6  | 3 | TT <sub>ca</sub> AAAT <sub>ca</sub>                 |
| DUS3L   | 3 | TGG <sub>ca</sub> T <sub>ca</sub>                   |
| PPP1R10 | 3 | ATG <sub>ca</sub> AA <sub>ca</sub> C <sub>Tca</sub> |
| FEZ1    | 3 | GCA <sub>ca</sub> AA <sub>ca</sub> T <sub>GT</sub>  |

Table S10. EMSA results for 45 uDBPs.

| Gene symbol | Protein Class        | DNA motif                 | EMSA results |
|-------------|----------------------|---------------------------|--------------|
| SMARCA5     | Chromatin            | CCCCACTGAACCCTTGACCCTGCCC | -            |
| JARID1D     | Chromatin            | CCCCACTGAACCCTTGACCCTGCCC | +            |
| DNMT3A      | Chromatin            | CACATCTGGACAGATGTGGGCG    | +            |
| SMARCAL1    | Chromatin            | CCCCTCCC                  | +            |
| CSRP2       | Coregulator          | CCCCTCCC                  | +            |
| NMI         | Coregulator          | GCTCTGGAAATTTCCAG         | +            |
| MAGEA8      | Coregulator          | GCTCTGGAAATTTCCAG         | +            |
| RCOR1       | Coregulator          | CCCCACTGAACCCTTGACCCTGCCC | +            |
| CD59        | DNA Repair           | GGGCTTCCCCC               | +            |
| WHSC2       | DNA Repair           | GGGCTTCCCCC               | +            |
| SPEG        | Kinase&Coregulator   | TTGTGTATGC                | +            |
| RIPK3       | Kinase               | GGGCTTCCCCC               | +            |
| MAP4K2      | Kinase               | GATTCATTTAGCAG            | +            |
| PIM2        | Kinase               | AGAGTGCCACCTACTGAAT       | +            |
| MAPK1       | Kinase               | AAAGAGAAAG                | +            |
| MYLK        | Kinase               | TTGCTTTGGAAGCAGCT         | +            |
| CAMKK2      | Kinase               | GACGACGAA                 | +            |
| MKNK2       | Kinase               | CCCTCCCG                  | -            |
| MARK2       | Kinase               | CTTCCGC                   | -            |
| ICK         | Kinase               | CTTCCGC                   | -            |
| MAP3K7      | Kinase               | CTTCCGC                   | +            |
| CLK1        | Kinase               | AATCATGTTTGAAG            | +            |
| LYPLAL1     | Mitochondrial        | CCCCTCCC                  | +            |
| MTHFD1      | Mitochondrial        | CCCTCCTC                  | +            |
| MTCP1       | Mitochondrial        | GGGCTTCCCCC               | +            |
| HSPE1       | Mitochondrial        | GGGCTTCCCCC               | +            |
| PRDX1       | Mitochondrial        | TTGTGTATGC                | +            |
| MRPL55      | Mitochondrial        | TTGTGTATGC                | +            |
| DUT         | Mitochondrial        | CTGCCGC                   | +            |
| PCK2        | Mitochondrial        | GACGACGAA                 | +            |
| SOD1        | Mitochondrial        | GACGACGAA                 | +            |
| CDK2AP1     | Nucleic Acid Binding | TCATTTTGCAAGTGCAA         | +            |
| WISP2       | Nucleic Acid Binding | GCGTGGAA                  | +            |
| ANXA1       | Other                | TTGTGTATGC                | +            |
| ADPRTL3     | Other                | ACTTGCGCC                 | +            |
| CSTF2       | RNA Binding          | TTCCGGAAA                 | +            |
| RBM12       | RNA Binding          | GGGCTTCCCCC               | +            |
| EIF4B       | RNA Binding          | GACATCTGGTTGCAATTTG       | +            |
| RNPC1       | RNA Binding          | TCTGTGTAT                 | +            |
| PSMA1       | RNA Binding          | TTCCATCATAAATC            | +            |
| KHDRBS3     | RNA Binding          | GGGCTTCCCCC               | +            |
| LARP7       | RNA Binding          | GGGCTTCCCCC               | +            |
| RBM19       | RNA Binding          | TTGTGTATGC                | +            |
| RBM8A       | RNA Binding          | TCTGTGTAT                 | +            |
| NCL         | RNA Binding          | CCCCTCCC                  | +            |

Table S11. ChIP experiments of unconventional DNA binding proteins identified by the previous studies and our study. The counts of DNA logos in the promoter regions of target genes were calculated using “countPWM” function in Biostrings package of Bioconductor (Gentleman et al., 2004), where 85% of minimum score was used. For the counts of binding sequences of CC2D1A, CDK2AP1 and ING4, “countPattern” function was used, where exact match was used for CDK2AP1 and ING4 and one miss match was allowed for CC2D1A.

| IP      | Experiment | Target gene | logo | Logo Counts | Reference                |
|---------|------------|-------------|------|-------------|--------------------------|
| RUVBL1  | ChIP-PCR   | TCF4        |      | 5           | (Feng et al., 2003)      |
| LRRFIP1 | ChIP-PCR   | TNF         |      | 3           | (Suriano et al., 2005)   |
| HNRPC   | ChIP-PCR   | CYP24A1     |      | 8           | (Ho et al., 2006)        |
| TIA1    | ChIP-PCR   | COL2A1      |      | 7           | (McAlinden et al., 2007) |
| STUB1   | ChIP-PCR   | TP53        |      | 21          | (Tripathi et al., 2007)  |
| CC2D1A  | ChIP-PCR   | DRD2        |      | 1           | (Rogaeva et al., 2007)   |
| SF3A3   | ChIP-PCR   | CHD1        |      | 18          | (Sims et al., 2007)      |
| CDK2AP1 | ChIP-PCR   | POU5F1      |      | 5           | (Deshpande et al., 2009) |
| DNMT3A  | ChIP-PCR   | TP53BP2     |      | 8           | (Li et al., 2006)        |
| DNMT3A  | ChIP-PCR   | RASSF1      |      | 6           | (Li et al., 2006)        |
| EWSR1   | ChIP-PCR   | CSF1R       |      | 6           | (Hume et al., 2008)      |
| ING4    | ChIP-PCR   | HIF1A       |      | 2           | (Ozer et al., 2005)      |
| CSTF2   | ChIP-chip  | global      |      |             | (Swinburne et al., 2006) |
| PCK2    | ChIP-PCR   | IGFALS      |      | 28          | Our study                |
|         | ChIP-PCR   | see         |      |             |                          |
| MAPK1   | ChIP-chip  | Figure 5    |      | Various     | Our study                |



Table S12. Proteins showing identical DNA-binding profiles are grouped in each row.

|           |           |        |         |         |        |       |
|-----------|-----------|--------|---------|---------|--------|-------|
| ARMC6     | CAMKK2    | CCM2   | CHGB    | DNAJB2  | NCAPH2 | XRCC4 |
| C19orf43  | CC2D1A    | MRLC2  | NIPBL   |         |        |       |
| COQ6      | CPSF1     | ICK    | MAP3K7  | MARK2   |        |       |
| C8orf4    | EIF2C2    |        |         |         |        |       |
| EIF1AX    | EIF5      | PANK1  | RPL7L1  |         |        |       |
| CLIC1     | FABP3     | GINS2  | RPA2    | TOMM70A | TRFP   |       |
| EFTUD2    | FKBP1B    |        |         |         |        |       |
| DDX25     | GLE1L     | POGK   |         |         |        |       |
| BANP      | HAVCR2    | INTS4  |         |         |        |       |
| DNMT2     | HIST1H2BB | KLHL21 | RPL12   | SMARCA5 |        |       |
| C17orf79  | ING4      | OPA3   | UBTD2   |         |        |       |
| EGLN2     | JTV1      |        |         |         |        |       |
| HINT2     | KIAA1509  |        |         |         |        |       |
| EIF4E2    | LDB2      | LSM4   | MAGEC2  | PCNA    | RSRC2  |       |
| EIF4E     | LHFP      |        |         |         |        |       |
| GPC5      | LOXL1     |        |         |         |        |       |
| HUS1      | MAGEB2    |        |         |         |        |       |
| DSE       | MAGEB3    | PAGE4  | PPP2R5D | RTCD1   |        |       |
| DIS3L     | NOL7      | POM121 | UTP11L  |         |        |       |
| CPEB4     | PCQAP     |        |         |         |        |       |
| LRCH3     | PLA2G1B   |        |         |         |        |       |
| DHX40     | PRDM7     |        |         |         |        |       |
| CD80      | PTGER3    |        |         |         |        |       |
| PSD       | RNF10     |        |         |         |        |       |
| FMR1      | RPP14     | XRCC2  |         |         |        |       |
| FARS2     | RPS14     |        |         |         |        |       |
| INTS7     | TBC1D2    |        |         |         |        |       |
| ProSAPiP1 | UBE2C     |        |         |         |        |       |
| FAS       | UBE2I     |        |         |         |        |       |
| KIAA1429  | UBE2V2    |        |         |         |        |       |

Table S13. Human TF-DNA binding domain families listed in Pfam database

|               |              |              |             |
|---------------|--------------|--------------|-------------|
| Zf-C2H2       | MH           | RFX          | P53         |
| Homeobox      | E2F          | AP-2         | zf-C2HC     |
| bZIP          | STAT         | bZIP-Maf     | CBF-B/NFY-A |
| HLH           | SRF          | Head-Shock   | zf-C4       |
| Forkhead      | Paired-box   | Runt         | GCM         |
| HMG_box       | T-box        | TEA          | HMG-I/HMG-Y |
| Ets           | zf-GATA      | ARID/BRIGHT  | MBD         |
| Hormone_recep | YL1          | bZIP/zf-C2H2 | PROX1       |
| Myb           | TIG          | CBF-D/NFY-B  |             |
| IRF           | CUT/Homeobox | HNF          |             |
| RHD           | zf-CCHC      | zf-NF-X1     |             |

## Supplemental References

- Ashburner, M., Ball, C. A., Blake, J. A., Botstein, D., Butler, H., Cherry, J. M., Davis, A. P., Dolinski, K., Dwight, S. S., Eppig, J. T., *et al.* (2000). Gene ontology: tool for the unification of biology. The Gene Ontology Consortium. *Nat Genet* 25, 25-29.
- Cline, M. S., Smoot, M., Cerami, E., Kuchinsky, A., Landys, N., Workman, C., Christmas, R., Avila-Campilo, I., Creech, M., Gross, B., *et al.* (2007). Integration of biological networks and gene expression data using Cytoscape. *Nat Protoc* 2, 2366-2382.
- Deshpande, A. M., Dai, Y. S., Kim, Y., Kim, J., Kimlin, L., Gao, K., and Wong, D. T. (2009). Cdk2ap1 is required for epigenetic silencing of Oct4 during murine embryonic stem cell differentiation. *J Biol Chem* 284, 6043-6047.
- Elemento, O., Slonim, N., and Tavazoie, S. (2007). A universal framework for regulatory element discovery across all genomes and data types. *Mol Cell* 28, 337-350.
- Elemento, O., and Tavazoie, S. (2005). Fast and systematic genome-wide discovery of conserved regulatory elements using a non-alignment based approach. *Genome Biol* 6, R18.
- Feng, Y., Lee, N., and Fearon, E. R. (2003). TIP49 regulates beta-catenin-mediated neoplastic transformation and T-cell factor target gene induction via effects on chromatin remodeling. *Cancer Res* 63, 8726-8734.
- Finn, R. D., Mistry, J., Schuster-Bockler, B., Griffiths-Jones, S., Hollich, V., Lassmann, T., Moxon, S., Marshall, M., Khanna, A., Durbin, R., *et al.* (2006). Pfam: clans, web tools and services. *Nucleic Acids Res* 34, D247-251.
- Gentleman, R. C., Carey, V. J., Bates, D. M., Bolstad, B., Dettling, M., Dudoit, S., Ellis, B., Gautier, L., Ge, Y., Gentry, J., *et al.* (2004). Bioconductor: open software development for computational biology and bioinformatics. *Genome Biol* 5, R80.
- Ho, S. W., Jona, G., Chen, C. T., Johnston, M., and Snyder, M. (2006). Linking DNA-binding proteins to their recognition sequences by using protein microarrays. *Proc Natl Acad Sci U S A* 103, 9940-9945.
- Hughes, J. D., Estep, P. W., Tavazoie, S., and Church, G. M. (2000). Computational identification of cis-regulatory elements associated with groups of functionally related genes in *Saccharomyces cerevisiae*. *J Mol Biol* 296, 1205-1214.
- Hume, D. A., Sasmono, T., Himes, S. R., Sharma, S. M., Bronisz, A., Constantin, M., Ostrowski, M. C., and Ross, I. L. (2008). The Ewing sarcoma protein (EWS) binds directly to the proximal elements of the macrophage-specific promoter of the CSF-1 receptor (*csf1r*) gene. *J Immunol* 180, 6733-6742.
- Li, H., Rauch, T., Chen, Z. X., Szabo, P. E., Riggs, A. D., and Pfeifer, G. P. (2006). The histone methyltransferase SETDB1 and the DNA methyltransferase DNMT3A interact directly and localize to promoters silenced in cancer cells. *J Biol Chem* 281, 19489-19500.
- Liu, X. S., Brutlag, D. L., and Liu, J. S. (2002). An algorithm for finding protein-DNA binding sites with applications to chromatin-immunoprecipitation microarray experiments. *Nat Biotechnol* 20, 835-839.
- Manning, G., Whyte, D. B., Martinez, R., Hunter, T., and Sudarsanam, S. (2002). The protein kinase complement of the human genome. *Science* 298, 1912-1934.
- McAlinden, A., Liang, L., Mukudai, Y., Imamura, T., and Sandell, L. J. (2007). Nuclear protein TIA-1 regulates COL2A1 alternative splicing and interacts with precursor mRNA and genomic DNA. *J Biol Chem* 282, 24444-24454.
- Ozer, A., Wu, L. C., and Bruick, R. K. (2005). The candidate tumor suppressor ING4 represses activation of the hypoxia inducible factor (HIF). *Proc Natl Acad Sci U S A* 102, 7481-7486.

Rogaeva, A., Ou, X. M., Jafar-Nejad, H., Lemonde, S., and Albert, P. R. (2007). Differential repression by freud-1/CC2D1A at a polymorphic site in the dopamine-D2 receptor gene. *J Biol Chem* 282, 20897-20905.

Roth, F. P., Hughes, J. D., Estep, P. W., and Church, G. M. (1998). Finding DNA regulatory motifs within unaligned noncoding sequences clustered by whole-genome mRNA quantitation. *Nat Biotechnol* 16, 939-945.

Sims, R. J., 3rd, Millhouse, S., Chen, C. F., Lewis, B. A., Erdjument-Bromage, H., Tempst, P., Manley, J. L., and Reinberg, D. (2007). Recognition of trimethylated histone H3 lysine 4 facilitates the recruitment of transcription postinitiation factors and pre-mRNA splicing. *Mol Cell* 28, 665-676.

Suriano, A. R., Sanford, A. N., Kim, N., Oh, M., Kennedy, S., Henderson, M. J., Dietzmann, K., and Sullivan, K. E. (2005). GCF2/LRRFIP1 represses tumor necrosis factor alpha expression. *Mol Cell Biol* 25, 9073-9081.

Swinburne, I. A., Meyer, C. A., Liu, X. S., Silver, P. A., and Brodsky, A. S. (2006). Genomic localization of RNA binding proteins reveals links between pre-mRNA processing and transcription. *Genome Res* 16, 912-921.

Tripathi, V., Ali, A., Bhat, R., and Pati, U. (2007). CHIP chaperones wild type p53 tumor suppressor protein. *J Biol Chem* 282, 28441-28454.

Wingender, E., Dietze, P., Karas, H., and Knuppel, R. (1996). TRANSFAC: a database on transcription factors and their DNA binding sites. *Nucleic Acids Res* 24, 238-241.

Xie, X., Lu, J., Kulbokas, E. J., Golub, T. R., Mootha, V., Lindblad-Toh, K., Lander, E. S., and Kellis, M. (2005). Systematic discovery of regulatory motifs in human promoters and 3' UTRs by comparison of several mammals. *Nature* 434, 338-345.

Xie, X., Mikkelsen, T. S., Gnirke, A., Lindblad-Toh, K., Kellis, M., and Lander, E. S. (2007). Systematic discovery of regulatory motifs in conserved regions of the human genome, including thousands of CTCF insulator sites. *Proc Natl Acad Sci U S A* 104, 7145-7150.

Xuan, Z., Zhao, F., Wang, J., Chen, G., and Zhang, M. (2005). Genome-wide promoter extraction and analysis in human, mouse, and rat. *Genome Biology* 6, R72.

Yu, X., Lin, J., Zack, D. J., and Qian, J. (2006). Computational analysis of tissue-specific combinatorial gene regulation: predicting interaction between transcription factors in human tissues. *Nucleic Acids Res* 34, 4925-4936.
